# Supplementary material
Source: publisher site journal article supplement (https://www.dovepress.com/article/226215)
Supplement: Supplementary file 1 [file get_supplementary_file.php]

**Supplementary material 1** Antibiotics tested in this study

| Class | Abbreviation | Antibiotic | Concentration |
| --- | --- | --- | --- |
| Aminoglycosides | GM | Gentamicin | 10 ug |
| NET | Netilmicin | 30 ug |
| AMK | Amikacin | 30 ug |
| Fluoroquinolones | OFX | Ofloxacin | 5 ug |
| LVX | Levofloxacin | 5 ug |
| NOR | Norfloxacin | 10 ug |
| AN | Nalidixic acid | 30 ug |
| CIP | Ciprofloxacin | 5 ug |
| Penicillin | AM | Ampicillin | 10 ug |
| 1st-4th generation cephalosporins | CF | Cefalotin | 30 ug |
| CFX | Cefuroxime | 30 ug |
| CFZ | Ceftazidime | 30 ug |
| CTX | Cefotaxime | 30 ug |
| CRO | Ceftriaxone | 30 ug |
| FEP | Cefepime | 30 μg |
| Monobactamic | ATM | Aztreonam | 30 μg |
| Penicillin with ESBL inhibitor | AMC | Amoxicillin-clavulanic acid | 20/10 μg |
| Sulphas | TSX | Trimetropim/ Sulphametoxazol | 1.25/ 23.75ug |
| Nitrofurans | MAC | Nitrofurantoin | 300 ug |
| Phosfonic acids | FOS | Fosfomycin | 200 μg |
| Phenicols | C | Cloramphenicol | 30 ug |
| Tetracyclines | TE | Tetracyclin | 30mg |
| polymyxins | CL | Colistin | 10mg |
| Carbapenemics | ETP | Ertapenem | 10mg |

Clinical & Laboratory Standards Institute (CLSI)1

| **Supplementary material 2** Genes and PAI sought in this study | | | | | | | |
| --- | --- | --- | --- | --- | --- | --- | --- |
| **PCR** | **Genes** | **oligonucleotides** | **Sequence** | **Length**  **Base pairs (bp)** | **Reference** | **Positive control** | **Tm (C°)** |
| mPCR1 | *fimH* | FimH F | CCTACAGCTGAACCCAAAG | 210 | Arenas-Hernández unpublished data | *E. coli* CFT073 | 57.7 |
| FimH 188 R | CGAAAGATCTACGACCAG |
| *fliC* | FliC 242 F | GCTGTCCGAAATCAACAACAA | 304 | Arenas-Hernández unpublished data |
| FliC 445 R | GGCTATCGTACCGGAACCATT |
| *satA* | satA 978F | CCAAAACAATGCAGATACCAC | 384 | Arenas-Hernández unpublished data |
| satA 1321R | ATTACCTTACCATTTCCGCTT |
| *iucD* | iucD-30F | GCTGTGGCTGGTAACTCAGG | 512 | Arenas-Hernández unpublished data |
| iucD512R | TGCTTCACACAGGGTGGTAAAT |
| mPCR2 | *iha* | IhaEMSAR | CGGAATTCCGATCTCCGATCATGTTAACCG | 150 | Rashid *et al.,* 20062 | *E. coli* CFT073+  *E. coli* O59I | 61.4 |
| IhaEMSAL | CGGAATTCCGGCATGCCGAGGCAGTCGTTA |
| *vatP* | vatP-86F | TAGCGCGCAATTCAACAATA | 226 | Arenas-Hernández unpublished data |
| vat226R | GCAGATAGTGCCAGAGAGGTAAG |
| *vatA* | vatA1076F | CCTGGGACATAATGGTCAGAT | 330 | Arenas-Hernández unpublished data |
| vatA1406R | CTGGCAATATTCACGCTACTG |
| *papGIII* | papG1/G3 F | CATGGCTGGTTGTTCCTAAACAT | 421 | Tiba *et al.* 20083 |
| papG2/G3 R | TCCAGAGACTGTGCAGAAGGAC |
| *papGII* | papG2 113F | GGAATGTGGTGATTACTCAAAGG | 562 | Tiba *et al.* 20083 |
| papG2/G3 R | TCCAGAGACTGTGCAGAAGGAC |
| mPCR3 | *papA* | papA-45F | CAGATATCTCTGGTGTGTTCAGTAA | 641 | Arenas-Hernández unpublished data | *E. coli* GAG1 | 61.4 |
| papA+31R | GGTCTTGCCTCACCCTGTAA |
| *satP* | satP 82F | AGCAAGCTGTTAGTAACCAACC | 880 | Arenas-Hernández unpublished data |
| satP 773R | GAGCCGCTGTCTCCGAATA |
| *hlyA* | hlyA-133F | ACTCATGTTGGTAAAGTATCAGAAT | 1, 280 | Arenas-Hernández unpublished data |
| hlyA1348R | AGCCAGTACAGTGCTTATCGTTG |
| PCR*cnf-1* | *cnf-1* | CNF1-71F | CTCGCCCAGTGATTAGGTATTC | 3, 100 | Arenas-Hernández unpublished data | *E. coli* GAG1 | 61.4 |
| CNF1 +60R | GCGCTAACAAAACAGCACAAGG |
| PAI mPCR-1 | PAIICFT073 | RPAi | GGACATCCTGTTACAGCGCGCA | 930 | Sabaté *et. al.,* 20064 | *E. coli* CFT073 | 60.1 |
| RPAf | TCGCCACCAATCACAGCGAAC |
| PAIIICFT073 | cft073.2Ent1 | ATGGATGTTGTATCGCGC | 400 | Sabaté *et. al.,* 20064 |
| cftO73.2Ent2 | ACGAGCATGTGGATCTGC |
| PAI mPCR-2 | PAIIJ96 | papGIF | TCGTGCTCAGGTCCGGAATTT | 400 | Sabaté *et. al.,* 20064 | *E. coli* J96 |
| papGIR | TGGCATCCCACATTATCG |
| PAIIIJ96 | hlyd | GGATCCATGAAAACATGGTTAATGGG | 2,400 | Sabaté *et. al.,* 20064 |
| cnf | GATATTTTTGTTGCCATTGGTTACC |

| Supplementary material 3 Antibiotic resistance in UPEC strains by study group and geographic area | | | | | | | |
| --- | --- | --- | --- | --- | --- | --- | --- |
| Class of antibiotics | Specifics antibiotics | Pregnant (n= 75) p=0.743 | | | Non-pregnant (n= 75) p= 0.601 | | |
| **Sonora** | **Puebla** | **pb** | **Sonora** | **Puebla** | **pb** |
| n=50 (%) | n=25 (%) | n=50 (%) | n=25 (%) |
| Aminoglycosides | Amikacin | 31 (62) | **24 (96)** | **0.001** | 32 (64) | 19 (76) | 0.431 |
| Gentamicin | 21 (42) | 14 (56) | 0.327 | 22 (44) | 10 (49) | 0.807 |
| Netilmicin | 5 (10) | 4 (24) | 0.164 | 2 (4) | **5 (20)** | **0.037** |
| β-lactams | Ampicillin | 50 (100) | 25 (100) | - | 50 (100) | 25 (100) | - |
| Cefalotine | 48 (96) | 24 (96) | 1 | 49 (98) | 25 (100) | 1 |
| Cefuroxime | 41 (82) | **25 (100)** | **0.025** | 50 (100) | 23 (92) | 0.108 |
| Cefotaxime | 35 (70) | 20 (80) | 0.417 | 47 (94) | 20 (80) | 0.107 |
| Ceftazidime | 37 (74) | 21 (84) | 0.393 | 33 (66) | 19 (76) | 0.435 |
| Ceftriaxone | 41 (82) | 24 (96) | 0.15 | 50 (100) | 24 (96) | 0.333 |
| Cefepime | 19 (38) | 8 (32) | 0.799 | 14 (28) | 6 (24) | 0.787 |
| Aztreonam | 20 (40) | 15 (60) | 0.141 | 15 (30) | 11 (44) | 0.304 |
| Amoxicillin/ Clavulanic Ácid | 37 (74) | 23 (92) | 0.075 | 47 (94) | 22 (84) | 212 |
| Fluoroquinolones | Nalidixic ácid | 37 (74) | 17 (68) | 0.596 | 37 (74) | 18 (72) | 1 |
| Ciprofloxacin | 29 (58) | 10 (40) | 0.152 | 22 (44) | 13 (52) | 0.624 |
| Ofloxacin | 27 (54) | 12 (48) | 0.634 | 18 (36) | 14 (56) | 0.137 |
| Norfloxacin | **28 (56)** | 13 (32) | **0.055** | 19 (38) | 14 (56) | 0.149 |
| Levofloxacin | **29 (58)** | 13 (32) | **0.049** | 16 (32) | 11 (44) | 0.321 |
| Nitrofurantoins | Nitrofurantoin | 20 (40) | 16 (64) | 0.085 | 41 (82) | 17 (68) | 0.242 |
| Sulphonamides | Cotrimoxazole | 32 (64) | 11 (44) | 0.137 | 35 (70) | 17 (68) | 1 |
| Phosphonates | Fosfomycin | 2 (4) | **5 (20)** | **0.037** | 2 (4) | 1 (4) | 1 |
| Phenicols | Chloramphenicol | 30 (60) | 9 (36) | 0.085 | 25 (50) | 11 (44) | 0.806 |
| Tetracyclines | Tetracyclin | **35 (70)** | 13 (52) | **0.304** | 29 (58) | 18 (72) | 0.313 |
| Polimixyns | Colistin | 35 (70) | 14 (56) | 0.136 | 34 (68) | 17 (68) | 1 |
| Carbapenems | Ertapenem | 6 (12) | 5 (20) | 0.489 | 4 (8) | 0 (0) | 0.294 |

**pb:** Fisher test exact. In bold the statistically significant values.

| Strain | Source | AMP | AMC | 1GC | 2GC | 3GC 3GC 3GC | | | 4GC | CARB | ATM | Substrate Profile | β-lactamase |
| --- | --- | --- | --- | --- | --- | --- | --- | --- | --- | --- | --- | --- | --- |
| CF | CFX | CFZ | CTX | CRO | FEP | ETP |
| 3 | Pregnant | R | R | R | R | S | S | R | S | S | S | FEP | ESBL |
| 11 | Pregnant | R | R | R | R | S | R | R | S | S | S | CFZ | ESBL |
| 13 | Pregnant | R | S | R | R | S | S | R | S | S | S | FEP | ESBL |
| 16 | Pregnant | R | R | R | R | R | R | R | S | S | S | CFZ,CTX | ESBL |
| 20 | Pregnant | R | R | R | R | R | R | R | R | S | R | CTX | ESBL |
| 22 | Pregnant | R | R | R | R | R | R | R | R | S | R | CFZ,CTX,FEP,ATM | ESBL |
| 27 | Pregnant | R | R | R | R | R | R | S | S | S | R | CFZ | ESBL |
| 30 | Pregnant | R | R | R | R | R | R | R | S | S | R | CRO,ATM | ESBL |
| 35 | Pregnant | R | R | R | R | R | R | R | R | S | R | CTX,FEP, ATM | ESBL |
| 37 | Pregnant | R | R | R | R | R | R | R | R | S | R | CTX,FEP,ATM | ESBL |
| 38 | Pregnant | R | R | R | R | R | R | R | R | S | R | CTX,FEP, ATM | ESBL |
| 39 | Pregnant | R | R | R | R | R | R | R | S | S | R | FEP | ESBL |
| 42 | Pregnant | R | R | R | R | R | R | R | R | R | R | CTX,FEP,ATM | CP |
| 45 | Pregnant | R | R | R | R | R | R | R | S | S | R | CTX,FEP,ATM | ESBL |
| 46 | Pregnant | R | R | R | R | R | R | R | S | R | R | ATM | CP |
| 47 | Pregnant | R | R | R | R | R | R | R | R | S | R | CTX,FEP,ATM | ESBL |
| 50 | Pregnant | R | R | R | R | R | R | R | R | S | R | CTX | ESBL |
| 1 | Non- Pregnant | R | R | R | R | S | S | R | S | S | S | FEP | ESBL |
| 26 | Non- Pregnant | R | R | R | R | R | R | R | S | S | R | CFZ | ESBL |
| 29 | Non- Pregnant | R | R | R | R | R | R | R | R | S | R | CTX,CRO,FEP | ESBL |
| 33 | Non- Pregnant | R | R | R | R | R | R | R | R | S | R | CTX,CRO,FEP,ATM | ESBL |
| 36 | Non- Pregnant | R | R | R | R | R | R | R | R | S | R | CTX,FEP,ATM | ESBL |

**Supplementary material 4.1** Possible classification and type of beta-lactamases, according to the antibiotic resistance by Kirby-Bauer and substrate profile by double-disk diffusion test, of isolated strains of pregnant and non-pregnant women in Puebla.

1GC: First generation Cephalosporin; 2GC: Second generation Cephalosporin; 3GC: Third generation Cephalosporin; 4GC: Fourth generation Cephalosporin; R: Resistant; S: Sensitive; ESBL: Extended spectrum β -lactamase ; CP: Carbapenemase; AMP: Ampicilin; AMC: Amoxicilin/Clavulanic Acid; CF: Cefalotin; CFX: Cefuroxime; FEP: Cefepime; CFZ: Ceftazidime; CTX: Cefotaxime; ATM: Aztreonam; CRO: Ceftriaxone. This analysis was carry out following the criteria of Bush *et al*., 2010 and Piccazo *et al*., 2011 5,6.

**Supplementary material 4.2** Possible classification and type of beta-lactamases, according to the antibiotic resistance by Kirby-Bauer and substrate profile by double-disk diffusion test, of isolated strains of pregnant women in Sonora (n=22)

| Strain | Source | AMP | AMC | 1GC | 2GC | 3GC 3GC 3GC | | | 4GC | CARB | ATM | Substrate Profile | β-lactamase |
| --- | --- | --- | --- | --- | --- | --- | --- | --- | --- | --- | --- | --- | --- |
| CF | CFX | CFZ | CTX | CRO | FEP | ETP |
| 2 | Pregnant | R | R | R | R | R | R | R | R | S | R | CFZ,CTX,ATM | ESBL |
| 5 | Pregnant | R | R | R | R | R | R | R | R | S | R | CTX,ATM | ESBL |
| 6 | Pregnant | R | R | R | R | S | S | R | S | S | S | CRO,ATM | ESBL |
| 7 | Pregnant | R | R | R | R | S | S | S | S | S | S | CFZ | ESBL |
| 8 | Pregnant | R | R | R | R | R | R | R | R | S | R | CFZ,CTX,CRO,FEP, ATM | ESBL |
| 9 | Pregnant | R | R | R | R | R | R | R | R | S | R | CFZ,CTX,CRO,FEP, ATM | ESBL |
| 13 | Pregnant | R | R | R | R | R | R | R | R | S | R | CFZ,CTX,CRO,FEP, ATM | ESBL |
| 16 | Pregnant | R | R | R | R | R | R | R | R | S | R | CTX,FEP,ATM | ESBL |
| 17 | Pregnant | R | R | R | R | R | R | R | R | S | R | CFZ,CTX,CRO,FEP, ATM | ESBL |
| 18 | Pregnant | R | R | R | R | R | R | R | R | R | R | CFZ,CTX,CRO,FEP, ATM | CP |
| 19 | Pregnant | R | R | R | R | R | R | R | R | R | R | CTX,FEP, ATM | CP |
| 21 | Pregnant | R | R | R | R | R | R | R | R | S | R | CFZ,CTX,CRO,FEP, ATM | ESBL |
| 22 | Pregnant | R | R | R | S | R | S | S | S | S | S | CFZ | ESBL |
| 23 | Pregnant | R | R | R | R | R | R | R | R | S | R | CFZ,CTX,CRO,FEP, ATM | ESBL |
| 27 | Pregnant | R | R | R | R | R | R | R | R | S | R | CFZ,CTX,FEP,ATM | ESBL |
| 28 | Pregnant | R | R | R | R | R | R | R | R | S | S | CFZ,CTX,FEP,ATM | ESBL |
| 29 | Pregnant | R | R | R | R | R | R | R | R | S | S | CFZ,CTX,FEP,ATM | ESBL |
| 32 | Pregnant | R | S | R | R | R | R | R | S | S | S | CTX | ESBL |
| 34 | Pregnant | R | R | R | R | S | R | R | S | S | S | CRO | ESBL |
| 36 | Pregnant | R | R | R | R | S | S | R | S | S | S | CFZ | ESBL |
| 40 | Pregnant | R | R | R | R | R | S | S | S | S | S | CFZ | ESBL |
| 44 | Pregnant | R | R | R | R | R | R | R | R | R | S | CTX,FEP | CP |

1GC: First generation Cephalosporin; 2GC: Second generation Cephalosporin; 3GC: Third generation Cephalosporin; 4GC: Fourth generation Cephalosporin;

R: Resistant; S: Sensitive; ESBL: Extended spectrum β -lactamase ; CP: Carbapenemase; AMP: Ampicilin; AMC: Amoxicilin/Clavulanic Acid; CF: Cefalotin;

CFX: Cefuroxime; FEP: Cefepime; CFZ: Ceftazidime; CTX: Cefotaxime; ATM: Aztreonam; CRO: Ceftriaxone. This analysis was carry out following the criteria of Bush *et al*., 2010 and Piccazo *et al*., 2011 5,6.

**Supplementary material 4.3** Possible classification and type of beta-lactamases, according to the antibiotic resistance by Kirby-Bauer and substrate profile bydouble*-*disk diffusion test,of isolated strains of non-pregnnt women in Sonora (n=23)

| Strain | Source | AMP | AMC | 1GC | 2GC | 3GC 3GC 3GC | | | 4GC | CARB | ATM | Substrate Profile | β-lactamase |
| --- | --- | --- | --- | --- | --- | --- | --- | --- | --- | --- | --- | --- | --- |
| CF | CFX | CFZ | CTX | CRO | FEP | ETP |
| 2 | Non-pregnant | R | R | R | R | R | R | R | S | S | S | CFZ,CRO | ESBL |
| 6 | Non-pregnant | R | R | R | R | R | R | R | R | S | R | CFZ,CTX,FEP,ATM | ESBL |
| 7 | Non-pregnant | R | R | R | R | R | R | R | R | S | R | CFZ,CTX,FEP,ATM | ESBL |
| 8 | Non-pregnant | R | R | R | R | R | R | R | R | S | R | CFZ,CTX,FEP,ATM | ESBL |
| 9 | Non-pregnant | R | R | R | R | R | R | R | R | S | R | CTX,FEP,ATM | ESBL |
| 10 | Non-pregnant | R | R | R | R | R | R | R | R | S | R | CFZ,CTX,FEP,ATM | ESBL |
| 11 | Non-pregnant | R | R | R | R | R | R | R | R | S | R | CFZ,CTX,FEP,ATM | ESBL |
| 12 | Non-pregnant | R | R | R | R | R | R | R | R | S | R | CFZ,CTX,FEP,ATM | ESBL |
| 13 | Non-pregnant | R | R | R | R | R | R | R | R | S | R | CFZ,CTX,FEP,ATM | ESBL |
| 17 | Non-pregnant | R | R | R | R | R | R | R | R | S | R | FEP | ESBL |
| 18 | Non-pregnant | R | R | R | R | R | R | R | S | S | R | CTX | ESBL |
| 19 | Non-pregnant | R | R | R | R | S | R | R | S | S | S | CFZ,CRO | ESBL |
| 22 | Non-pregnant | R | R | R | R | S | R | R | S | R | S | CFZ,FEP | CP |
| 24 | Non-pregnant | R | R | R | R | S | R | R | S | S | S | CFZ,CTX | ESBL |
| 37 | Non-pregnant | R | S | R | R | R | R | R | S | S | S | CFZ,FEP | ESBL |
| 40 | Non-pregnant | R | R | R | R | R | R | R | R | S | R | CFZ,CTX,FEP,ATM | ESBL |
| 41 | Non-pregnant | R | R | R | R | S | R | R | S | S | S | CRO | ESBL |
| 42 | Non-pregnant | R | R | R | R | R | R | R | R | S | R | CTX,CRO,FEP,ATM | ESBL |
| 45 | Non-pregnant | R | R | R | R | S | R | R | S | S | S | CFZ,CTX,CRO | ESBL |
| 47 | Non-pregnant | R | R | R | R | R | R | R | R | S | R | CFZ,CTX,FEP,ATM | ESBL |
| 48 | Non-pregnant | R | R | R | R | R | R | R | R | S | R | CFZ,CTX,FEP,ATM | ESBL |
| 49 | Non-pregnant | R | R | R | R | R | R | R | R | S | R | CFZ,CTX,FEP,ATM | ESBL |
| 50 | Non-pregnant | R | R | R | R | S | R | R | S | S | S | CFZ,CTX,FEP | ESBL |

1GC: First generation Cephalosporin; 2GC: Second generation Cephalosporin; 3GC: Third generation Cephalosporin; 4GC: Fourth generation Cephalosporin; R: Resistant; S: Sensitive; ESBL: Extended spectrum β -lactamase ; CP: Carbapenemase; AMP: Ampicilin; AMC: Amoxicilin/Clavulanic Acid; CF: Cefalotin; CFX: Cefuroxime; FEP: Cefepime; CFZ: Ceftazidime; CTX: Cefotaxime; ATM: Aztreonam; CRO: Ceftriaxone. This analysis was carry out following the criteria of Bush *et al*., 2010 and Piccazo *et al*., 2011 5,6.

**Supplementary material 5** ESBL production and antibiotic resistance in UPEC strains from Sonora and Puebla

| Antibiotic | SONORA  n= 100 | | | | | | PUEBLA  n= 50 | | | | | |
| --- | --- | --- | --- | --- | --- | --- | --- | --- | --- | --- | --- | --- |
| Pregnant  n= 50 | | | Non-pregnant  n= 50 | | | Pregnant  n= 25 | | | Non-pregnant  n= 25 | | |
| ESBL+  n=22 (%) | ESBL-  n=28 (%) | pb | ESBL+  n= 23 (%) | ESBL-  n= 27 (%) | pb | ESBL+  n= 17 (%) | ESBL-  n= 8 (%) | pb | BLEE+  n= 5 (%) | BLEE-  n= 20 (%) | pb |
| Amikacin | 15 (68) | 16 (57) | 0.55 | 16 (70) | 16 (59) | 0.55 | 17 (100) | **7 (88)** | 0.32 | 4 (80) | 15 (75) | 1 |
| Gentamicin | 11 (50) | 10 (36) | 0.39 | 13 (57) | 9 (33) | 0.15 | 10 (59) | 4 (50) | 1 | 3 (60) | 7 (35) | 0.35 |
| Netilmicin | 2 (9) | 3 (11) | 1 | 0 (0) | 2 (7) | 0.49 | 6 (35) | 0 (0) | 0.12 | 1 (20) | 4 (20) | 1 |
| Nalidixic acid | 18 (82) | 19 (68) | 0.33 | 15 (65) | 22 (81) | 0.21 | 14 (82) | 3 (38) | 0.06 | 2 (40) | 16 (80) | 0.11 |
| Ciprofloxacin | 16 (72) | 13 (46) | 0.08 | 12 (52) | 10 (37) | 0.39 | 9 (53) | 1 (12.5) | 0.08 | 1 (20) | 12 (60) | 0.16 |
| Ofloxacin | 15 (68) | 12 (43) | 0.09 | 10 (43) | 8 (30) | 0.56 | 10 (59) | 2 (25) | 0.2 | 2 (40) | 12 (60) | 0.62 |
| Norfloxacin | 15 (68) | 13 (46) | 0.15 | 10 (43) | 9 (33) | 0.56 | **8 (47)** | **0 (0)** | **0.02** | 2 (40) | 12 (60) | 0.62 |
| Levofloxacin | 16 (72) | 13 (46) | 0.08 | 10 (43) | 6 (22) | 0.13 | **8 (47)** | **0 (0)** | **0.02** | 1 (20) | 10 (50) | 0.34 |
| Trimethoprim-  Sulfamethoxazole | **19 (86)** | **13 (46)** | **0.006** | **22 (96)** | **13 (48)** | **0** | 8 (47) | 3 (38) | 1 | 4 (80) | 13 (65) | 1 |
| Nitrofurantoin | 9 (40) | 11 (39) | 1 | 17 (74) | 24 (89) | 0.26 | 10 (59) | 6 (75) | 0.66 | 5 (100) | 11 (55) | 0.12 |
| Chloramphenicol | 16 (72) | 14 (50) | 0.14 | 14 (61) | 11 (41) | 0.25 | 6 (35) | 3 (38) | 1 | **0 (0)** | **11 (55)** | **0.04** |
| Ampicillin | 22 (100) | 28 (100) | - | 23 (100) | 27 (100) | - | 17 (100) | 8 (100) | - | 5 (100) | 20 (100) | - |
| Cefalotin | 22 (100) | 26 (93) | 0.49 | 22 (96) | 27 (100) | 0.46 | 17 (100) | 7 (88) | 0.32 | 5 (100) | 20 (100) | - |
| Cefuroxime | 21 (95) | 20 (71) | 0.06 | 23 (100) | 27 (100) | - | 17 (100) | 8 (100) | - | 5 (100) | 18 (90) | 1 |
| Ceftazidime | 18 (82) | 19 (68) | 0.33 | 17 (74) | 16 (59) | 0.37 | 14 (82) | 7 (88) | 1 | 4 (80) | 15 (75) | 1 |
| Cefotaxime | 17 (77) | 18 (65) | 0.36 | 23 (100) | 24 (88) | 0.23 | 15 (88) | 5 (62.5) | 0.28 | 4 (80) | 16 (80) | 1 |
| Ceftriaxone | 19 (86) | 22 (79) | 0.71 | 23 (100) | 27 (100) | - | 16 (94) | 8 (100) | 1 | 5 (100) | 19 (95) | 1 |
| Cefepime | **15 (68)** | **4 (14)** | **0** | **14 (61)** | **0 (0)** | **0** | **8 (47)** | **0 (0)** | **0.02** | 2 (40) | 4 (20) | 0.56 |
| Aztreonam | **15 (68)** | **5 (18)** | **0** | **15 (65)** | **0 (0)** | **0** | 12 (70) | 3 (38) | 0.19 | 4 (80) | 7 (35) | 0.13 |
| Amoxicilin- clavulanic acid | **21 (95)** | **16 (57)** | **0** | 22 (96) | 25 (93) | 1 | 16 (94) | 7 (88) | 1 | 5 (100) | 16 (80) | 0.54 |
| Fosfomycin | 1 (4) | 1 (4) | 1 | 0 (0) | 2 (7) | 0.49 | 3 (18) | 2 (25) | 1 | 1 (20) | 0 (0) | 0.2 |
| Colistin | 16 (72) | 19 (68) | 0.76 | 14 (61) | 20 (74) | 0.37 | 10 (59) | 4 (50) | 1 | 2 (40) | 15 (75) | 0.28 |
| Tetratcyclin | **22 (100)** | **13 (46)** | **0** | 15 (65) | 14 (52) | 0.39 | 10 (59) | 3 (38) | 0.4 | 3 (60) | 15 (75) | 0.59 |
| Ertapenem | 3 (12) | 3 (11) | 1 | 1 (4) | 3 (11) | 0.61 | 2 (12) | 3 (38) | 0.28 | 0 (0) | 0 (0) | - |
|  |  |  |  |  |  |  |  |  |  |  |  |  |

pb: Fisher test exact. In bold the statistically significant values

**Supplementary material 6.1 (Figure 2 data).** Virulence genes distribution in *E. coli* isolates from urine of pregnant and non-pregnant women from Sonora (A) and Puebla (B), Mexico.

| (A) *E. coli* isolates from women in Sonora (n=100) *p value*a1= 0.170 | | | | |
| --- | --- | --- | --- | --- |
| Genes | Pregnant (%)  n=50 | Non-pregnant (%)  n=50 | Total  n=100 (%) | *p valuea2* |
| *fimH* | 50 (100) | 50 (100) | 100 (100) | - |
| *papG+papA* | 13 (26) | 6 (12) | 19 (19) | 0.124 |
| *iha* | 23 (46) | 33 (66) | 56 (56) | 0.069 |
| *iucD* | 46 (92) | 44 (88) | 90 (90) | 0.740 |
| *satA+satP* | 13 (26) | 16 (32) | 29 (29) | 0.659 |
| *vatA+vatP* | 17 (34) | 12 (24) | 29 (29) | 0.378 |
| *hlyA* | **22 (44)** | 11 (22) | 33 (33) | **0.032** |
| *cnf1* | 7 (14) | 5 (10) | 12 (12) | 0.759 |
| *ªfliC* | 19 (38) | 14 (28) | 33 (33) | 0.306 |
| (B) *E. coli* isolates from women in Puebla (n=50) pa1= 0.300 | | | | |
| Genes | Pregnant (%)  n=25 | Non-pregnant (%)  n=25 | Total  n=50 (%) | *p value*a2 |
| *fimH* | 25 (100) | 25 (100) | 50 (100) | - |
| *papG+papA* | 10 (40) | 12 (48) | 22 (44) | 0.776 |
| *Iha* | 15 (60) | 17 (68) | 32 (64) | 0.768 |
| *iucD* | 21 (84) | 19 (76) | 40 (80) | 0.725 |
| *satA+satP* | 10 (40) | 11 (44) | 21 (42) | 1 |
| *vatA+vatP* | **10 (40)** | 3 (12) | 13 (26) | **0.050** |
| *hlyA* | 14 (56) | 8 (32) | 22 (44) | 0.153 |
| *cnf1* | 2 (8) | 7 (28) | 9 (18) | 0.138 |
| *fliC* | 11 (44) | 4 (16) | 15 (30) | 0.062 |

*fimH*: gene that codified for the type 1 pilus adhesin; *papG+papA:* genes that codified for adhesin and pilin of the type P pili; *iha:* gene that codified for the enterobactin receptor/Irg homologue adhesin; *iucD:* gene that codified for the aerobactin receptor; *satA+satP:* genes that codified for autotransporter and peptidase regions of the secreted autotransporter toxin; *vatA+vatP:* genes that codified for autotransporter and peptidase regions of the vacuolating autotransporter toxin; *hlyA:* gene that codified for the pro-α-hemolysin; *cnf-1:* gene that codified for the cytotoxic necrotizing factor; *fliC:* gene that codified for the subunit of flagelin. pa1: Statistic analysis of the number of virulence genes between study groups; pa2: Statistic analysis of the major prevalence of each virulence genes between study groups. In bold the statistically significance results. pa: Fisher’s exact test.

**Supplementary material 6.2** Prevalence of virulence genes by geographical area

| *Gen* | Sonora n= 100 (%) | Puebla n= 50 (%) | pa |
| --- | --- | --- | --- |
| *fimH* | 100 (100) | 50 (100) | - |
| *papG+papA* | 19 (19) | **22 (44)** | **0.001** |
| *iha* | 56 (56) | 32 (64) | 0.38 |
| *iucD* | 90 (90) | 40 (80) | 0.12 |
| *satA+satP* | 29 (29) | 21 (42) | 0.14 |
| *vatA+vatP* | 29 (29) | 13 (26) | 0.84 |
| *hlyA* | 33 (33) | 22 (44) | 0.1 |
| *cnf-1* | 12 (12) | 9 (18) | 0.32 |
| *fliC* | 33 (33) | 15 (30) | 1 |
| pc: x2; -: the value of p could not be obtained; In bold the statistically significant values. | | | |

**Supplementary material 7** Prevalence of genes reported in PAIs

| Gen/PAI | Sonoraa  n (%) | Pueblab  n (%) |
| --- | --- | --- |
| *hlyA* | **33 (33)** | **22 (44)** |
| PAI ICFT073 | 35 (35) | 29 (58) |
| PAI IJ96 | 9 (9) | 9 (18) |
| PAI IIJ96 | 8 (8) | 13 (26) |
| *cnf-1* | **12 (12)** | **9 (18)** |
| PAI IIJ96 | 8 (8) | 13 (26) |
| *papG+papA* | **19 (19)** | **22 (44)** |
| PAI ICFT073 | 35 (35) | 29 (58) |
| PAI IICFT073 | 36 (36) | 18 (36) |
| PAI IJ96 | 9 (9) | 9 (18) |
| a. 100 was the total number of strains; b. 50 was the total number of strains  In bold virulence factors that are localized in PAIs | | |

**Supplementary material 8.1.** Iron uptake phenotype of UPEC strains isolated from Puebla.


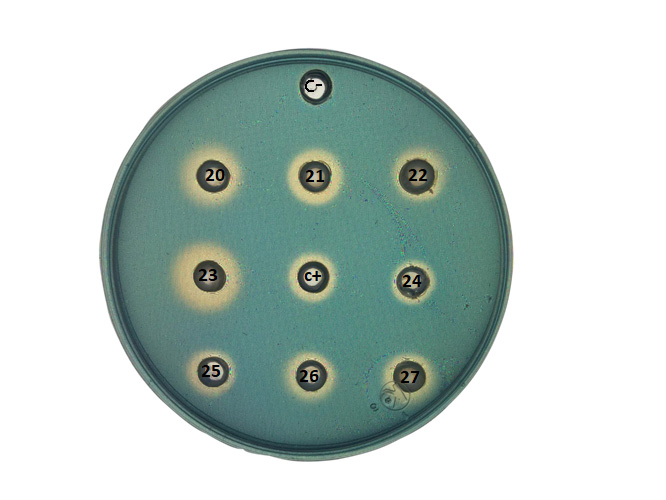


**C-:** Negative control. Strains 20 and 23 have halo with double coloration (Yellow-Orange). The method was modify from Sung *et al*., 2011 7.

**Supplementary material 8.2.** Hemolysis phenotype of UPEC strains isolated from Puebla


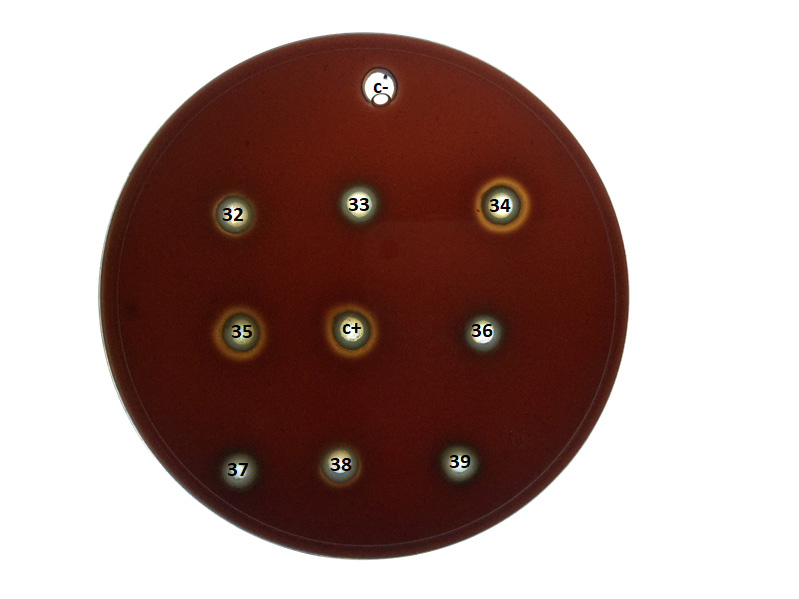


**C-:** Negative control

**Supplementary Material 9** Correlation between hemolytic phenotype and hlyA genotype in UPEC strains isolated from Sonora and Puebla

| Study group | hemolytic phenotype | Genotype (*hlyA*) | *hlyA*+hemolytic phenotype |
| --- | --- | --- | --- |
| Pregnant from Sonora | 19 (38) | 22 (44) | 8 (16) |
| Non-pregnant from Sonora | 28 (56) | 11 (22) | 6 (12) |
| Pregant from Puebla | 11 (44) | 14 (56) | 6 (24) |
| Non-pregnant from Puebla | 7 (28) | 8 (32) | 2 (8) |

Pregnant from Sonora n= 50; Non-pregnant from Sonora n= 50; Pregnant from Puebla n=25; Non-pregnant from

Puebla n=25.

| Supplementary 10.1 Serotypes found in the *E. coli* strains isolated from pregnant women (n = 25) in Puebla and pathotypes or associated clinical reports. | | | | |
| --- | --- | --- | --- | --- |
| Serotype | Serotype associated to pathotype or clinic case | n (%) | Accumulated % | Reference |
| O18ac:H7 | UPEC | 2 (8%) | 36% | Wiles, Kulesus, & Mulvey, 20088 |
| O25:H4 | 4 (16%) |
| O6:H1 | 3 (12%) |
| O7:H18 | ETEC | 1 (4%) | 4% | Cravioto, R.J. Gross, 19799 |
| O1:H- | STEC or UPEC | 1 (4%) | 4% | Blanco*, et al*., 2004; Constantiniu,2013; Rodriguez-Angeles, 2002; Wiles, Kulesus, & Mulvey, 20088,10–12 |
| O2:H6 | Heteropathogenic *E. coli* | 2 (8%) | 8% | Bielaszewska, *et al*., 201413 |
| O15:H1 | Isolated from diarrhea in Mexico | 1 (4%) | 8% | Bourdin, *et al*.,201414 |
| O48:H30 | 1 (4%) |
| O8:H25 | isolated from lactating calves | 1 (4%) | 4% | Donaldson, *et al*., 2006 |
| OR:H4 | Unreported | 2 (8%) | 16% | - |
| O139:H9 | 2 (8%) |
| O?:H- | NT | 1 (4%) | 28% | - |
| O?:H? | 2 (8%) |
| O?:H36 | 1 (4%) |
| O?:H40 | 1 (4%) |
| O25:H? | 2 (8%) |

UPEC, Uropathogenic *Escherichia coli*; ETEC, Enterotoxigenic *Escherichia coli*; STEC, Shiga toxin-producing *Escherichia coli*; Heteropateropathogenic *E. coli*, First serotype associated with hybrid strains UPEC-DAEC; NT, Not typable; DAEC, Diarreagenic *Escherichia coli*; -, No reference association.

| Serotype | Serotype associated to pathotype or clinic case | n=25 (%) | Accumulated % | Reference |
| --- | --- | --- | --- | --- |
| O1:H6 | UPEC | 1 (4%) | 28% | Wiles, Kulesus, & Mulvey, 20088 |
| O102:H6 | 2 (8%) | Molina-López, *et al*., 201116 |
| O25:H4 | 3 (12%) | Wiles, Kulesus, & Mulvey, 20088 |
| O6:H1 | 1 (4%) |
| O27:H- | ETEC | 1 (4%) | 16% | Cravioto, R.J. Gross, 19799Cr |
| O7:H18 | 2 (8%) |
| OR:H10 | 1 (4%) |
| OR:H- | STEC | 1 (4%) | 4% | Constantiniu, 200211 |
| O15:H18 | EAEC, EPEC and isolated from ITU cases in USA | 2 (8%) | 8% | Regua-Mangia*, et al*., 2010; Rodriguez-Angeles, 20028,10–12 |
| O2:H6 | Hereropatogenic *E. coli* | 2 (8%) | 8% | Bielaszewska, *et al*., 201413 |
| O16:H- | Unreported | 1 (4%) | 24% | - |
| OR:H4 | 1 (4%) |
| OR:H7 | 4 (16%) |
| O?:H- | NT | 2 (8%) | 16% | - |
| O?:H? | 2 (8%) |

**Supplementary10.2** Serotypes found in the *E. coli* strains from non-pregnant women (n=25) in Puebla and pathotypes or associated clinical reports.

UPEC, Uropathogenic *Escherichia coli*; ETEC, Enterotoxigenic *Escherichia coli*; STEC, Shiga toxin producing *Escherichia coli*; Heteropateropathogenic *E. coli*, First serotype associated with hybrid strains UPEC-DAEC; NT, Not typable; DAEC, Diarreagenic *Escherichia coli*; -, No reference association.

**Supplementary 10.3** Serotypes found in the *E. coli* strains isolated from pregnant women (n = 50) in Sonora

| Serotype | Serotype associated to -pathotype or clinic case | n=50 (%) | Accumulated % | Reference |
| --- | --- | --- | --- | --- |
| 025:H4 | UPEC | 8 (16%) | 28% | Wiles, *et al.*, 20088 |
| 06:H1 | 4 (8%) |
| O153:H6 | 2 (4%) | Regua-Mangia*. et al*., 201017 |
| O78:H- | STEC | 3 (6%) | 8% | Lienemann & Salo, 201218 |
| O6:H10 | 1 (2%) | Blanco, *et al*., 200319 |
| O75:H- | UPEC or STEC | 4 (8%) | 8% | Rodriguez-Angeles, 200210 |
| O44:H18 | EAEC | 1 (2%) | 2% | Rodriguez-Angeles, 200210 |
| O15:H18 | EAEC, EPEC and isolated from ITU cases in USA | 3 (6%) | 6% | Regua-Mangia, *et al*., 201017 |
| O2:H6 | Heteropatogenic *E. coli* | 2 (4%) | 4% | Bielaszewska, *et al*., 201413 |
| O2:H4 | Isolated from diarrhea in humans | 1 (2%) | 6% | Bourdin, *et al*., 201414 |
| OR:H9 | 2 (4%) |
| O20:H9 | Isolated from neonatal sepsis | 9 (18%) | 18% | Carrillo-Casas, *et al*., 201320C |
| O165:H10 | Associated with hemolytic uremic syndrome | 1 (2%) | 2% | Regua-Mangia, *et al*., 201017 |
| O2:H- | Others | 1 (2%) | 4% | Pearce, *et al*., 201021 |
| O21:H10 | 1 (2%) |
| O132:H10 | Unreported | 1 (2%) | 10% | - |
| O149:H20 | 1 (2%) |
| O175:H5 | 1 (2%) |
| O41:H34 | 1 (2%) |
| O78:H1 | 1 (2%) |
| O?:H- | NT | 1 (2%) | 6% | - |
| O?:H1 | 1 (2%) |
| O?:H11 | 1 (2%) |

UPEC, Uropathogenic *Escherichia coli*; ETEC, Enterotoxigenic *Escherichia coli*; STEC, Shiga toxin producing *Escherichia coli*; Heteropateropathogenic *E. coli*, First serotype associated with hybrid strains UPEC-DAEC; NT, Not typable; DAEC, Diarreagenic *Escherichia coli*; -, No reference association.

UPEC, Uropathogenic *Escherichia coli*; ETEC, Enterotoxigenic *Escherichia coli*; STEC, Shiga toxin producing *Escherichia coli*; Heteropateropathogenic *E. coli*, First serotype associated with hybrid strains UPEC-DAEC; NT, Not typable; DAEC, Diarreagenic *Escherichia coli*; -, No reference association.

| Supplementary 10.4 Serotypes found in the *E. coli* strains isolated from non-pregnant women (n = 50) in Sonora. | | | | |
| --- | --- | --- | --- | --- |
| Serotype | Serotype associated to pathotype or clinic case | n=50 (%) | Accumulated % | Reference |
| O75:H44 | UPEC | 1 (2%) | 18% | Wiles, *et al*, 2008; Sainz, *et al*,20088,22 |
| O25:H4 | 4 (8%) |
| O6:H1 | 4 (8%) |
| O153:H18 | STEC | 1 (2%) | 10% | Zhang, *et al*., 200223 |
| O73:H18 | 1 (2%) |
| O78:H- | 1 (2%) | Cravioto, *et al*., 19799 |
| O8:H19 | 1 (2%) | Blanco, *et al*., 200319 |
| O9:H21 | 1 (2%) |
| O75:H- | UPEC or STEC | 2 (4%) | 4% | Regua-Manguia, *et al*. 201017 |
| O7:H15 | ETEC | 1 (2%) | 2% | Rowe, *et al*., 19799 |
| 015:H18 | EAEC, EPEC and isolated from UTI cases | 3 (6%) | 6% | Rodriguez-Angeles, 2002; Regua-Mangia, *et al*., 201010,17 |
| O2:H6 | Heteropatogenic *E. coli* | 1 (2%) | 2% | Bielaszewska, *et al*., 201413 |
| O20:H9 | Isolated from neonatal sepsis | 4 (8%) | 8% | Carrillo-Casas, *et al*., 201320 |
| O22:H1 | Isolated from diarrhea in humans | 1 (2%) | 12% | Bourdin, *et al*., 201414 |
| O44:H18 | 5 (10%) |
| O101:H9 | Isolated from animal infections | 1 (2%) | 6% | Poppe, *et al*., 200424 |
| O9:H- | 2 (4%) | Blanco, *et al*.,200319 |
| O178:H10 | Unreported | 1 (2%) | 18% | - |
| O21:H4 | 1 (2%) |
| O53:H10 | 1 (2%) |
| O8:H1 | 1 (2%) |
| O8:H25 | 1 (2%) |
| OR:H19 | 1 (2%) |
| OR:H25 | 1 (2%) |
| O1:H15 | 2 (4%) |
| O?:H- | NT | 1 (2%) | 14% | - |
| O?:H10 | 1 (2%) |
| O?:H18 | 1 (2%) |
| O?:H7 | 1 (2%) |
| O?:H9 | 1 (2%) |
| O101:H? | 1 (2%) |
| O48:H? | 1 (2%) |

The results were analyzed using two samples test and Fisher test using the Minitab 18, Statistix 10 trial and GraphPad Prims 6 software. The level of significance was set at a p value ≤ 0.05.

In this document we shown the statistical analysis for each result in the paper.

**ANTIBIOTIC RESISTANCE**

This table show the number of tested antibiotics to which each strain obtain in Sonora Resist,

| Strain ID | Number of antibiotics tested antibiotics to which each strain is resistant | |
| --- | --- | --- |
| **Non-pregnant women from Sonora** | **Pregnant women from Sonora** |
| 1 | 13 | 12 |
| 2 | 16 | 18 |
| 3 | 10 | 8 |
| 4 | 9 | 5 |
| 5 | 6 | 18 |
| 6 | 18 | 10 |
| 7 | 12 | 7 |
| 8 | 20 | 20 |
| 9 | 19 | 18 |
| 10 | 17 | 7 |
| 11 | 18 | 10 |
| 12 | 14 | 11 |
| 13 | 18 | 20 |
| 14 | 11 | 6 |
| 15 | 18 | 3 |
| 16 | 10 | 18 |
| 17 | 15 | 10 |
| 18 | 13 | 21 |
| 19 | 10 | 19 |
| 20 | 14 | 8 |
| 21 | 13 | 20 |
| 22 | 13 | 8 |
| 23 | 10 | 19 |
| 24 | 11 | 10 |
| 25 | 14 | 17 |
| 26 | 14 | 8 |
| 27 | 12 | 20 |
| 28 | 12 | 22 |
| 29 | 14 | 21 |
| 30 | 7 | 12 |
| 31 | 15 | 12 |
| 32 | 18 | 11 |
| 33 | 14 | 11 |
| 34 | 12 | 13 |
| 35 | 12 | 13 |
| 36 | 18 | 11 |
| 37 | 9 | 16 |
| 38 | 11 | 12 |
| 39 | 15 | 6 |
| 40 | 14 | 11 |
| 41 | 12 | 16 |
| 42 | 21 | 19 |
| 43 | 11 | 16 |
| 44 | 16 | 19 |
| 45 | 13 | 10 |
| 46 | 13 | 17 |
| 47 | 20 | 17 |
| 48 | 17 | 7 |
| 49 | 16 | 21 |
| 50 | 16 | 21 |

Then we compare the mean of resistance between the two study groups (strains from preganant women vs strains from non-pregnant women in Sonora)

**Descriptive Statistics**

| Study group | Mean | Standard deviation | Minimum | Median | Maximum | **asymmetry** |
| --- | --- | --- | --- | --- | --- | --- |
| Non-pregnant women | 13.880 | 3.414 | 6.000 | 14.000 | 21.000 | 0.03 |
| Pregnant women | 13.700 | 5.281 | 3.000 | 12.500 | 22.000 | -0.09 |

| **Two samples test**  μ₁: media de la muestra 1 |
| --- |
| µ₂: media de la muestra 2 |
| Diferencia: μ₁ - µ₂ |

*No se presupuso igualdad de varianzas para este análisis.*

Estadísticas descriptivas

| Muestra | N | Media | Desv.Est. | Error estándar de la media |
| --- | --- | --- | --- | --- |
| Muestra 1 | 50 | 13.88 | 3.40 | 0.48 |
| Muestra 2 | 50 | 13.70 | 5.20 | 0.74 |

Estimación de la diferencia

| Diferencia | IC de 95% para la diferencia |
| --- | --- |
| 0.180 | (-1.567, 1.927) |

Prueba

| Hipótesis nula | H₀: μ₁ - µ₂ = 0 |
| --- | --- |
| Hipótesis alterna | H₁: μ₁ - µ₂ ≠ 0 |

| Valor T | GL | Valor p |
| --- | --- | --- |
| 0.20 | 84 | 0.838 |

Then we analyze if there was a difference in the resistance to each specific antibiotic between both groups.

Estadísticas tabuladas: Amikacina, Columnas de la hoja de trabajo

Filas: Amikacina   Columnas: Columnas de la hoja de trabajo

|  | Sonora Gestantes | Sonora No gestantes | Todo |
| --- | --- | --- | --- |
|  |  |  |  |
| Amikacina Resistente | 31 | 32 | 63 |
| Amikacina Sensible | 19 | 18 | 37 |
| Todo | 50 | 50 | 100 |

*Contenido de la celda
      Conteo*

Prueba exacta de Fisher

| Valor p |
| --- |
| 1 |

Estadísticas tabuladas: Gentamicina, Columnas de la hoja de trabajo

Filas: Gentamicina   Columnas: Columnas de la hoja de trabajo

|  | Sonora Gestantes_1 | Sonora No gestantes_1 | Todo |
| --- | --- | --- | --- |
|  |  |  |  |
| Gentamicina Resistente | 21 | 22 | 43 |
| Gentamicina Sensible | 29 | 28 | 57 |
| Todo | 50 | 50 | 100 |

*Contenido de la celda
      Conteo*

Prueba exacta de Fisher

| Valor p |
| --- |
| 1.00000 |

Estadísticas tabuladas: Netilmicina, Columnas de la hoja de trabajo

Filas: Netilmicina   Columnas: Columnas de la hoja de trabajo

|  | Sonora Gestantes_2 | Sonora No gestantes_2 | Todo |
| --- | --- | --- | --- |
|  |  |  |  |
| Netilmicina Resistente | 5 | 2 | 7 |
| Netilmicina Sensible | 45 | 48 | 93 |
| Todo | 50 | 50 | 100 |

*Contenido de la celda
      Conteo*

Prueba exacta de Fisher

| Valor p |
| --- |
| 0.436032 |

Estadísticas tabuladas: Ácido nalidixico, Columnas de la ... a de trabajo

Filas: Ácido nalidixico   Columnas: Columnas de la hoja de trabajo

|  | Sonora Gestantes_3 | Sonora No gestantes_3 | Todo |
| --- | --- | --- | --- |
|  |  |  |  |
| Ácido nalidixico Resistente | 37 | 37 | 74 |
| Ácido nalidixico Sensible | 13 | 13 | 26 |
| Todo | 50 | 50 | 100 |

*Contenido de la celda
      Conteo*

Prueba exacta de Fisher

| Valor p |
| --- |
| 1 |

Estadísticas tabuladas: Ciprofloxacino, Columnas de la hoja de trabajo

Filas: Ciprofloxacino   Columnas: Columnas de la hoja de trabajo

|  | Sonora Gestantes_4 | Sonora No gestantes_4 | Todo |
| --- | --- | --- | --- |
|  |  |  |  |
| Ciprofloxacina Resistente | 29 | 22 | 51 |
| Ciprofloxacina Sensible | 21 | 28 | 49 |
| Todo | 50 | 50 | 100 |

*Contenido de la celda
      Conteo*

Prueba exacta de Fisher

| Valor p |
| --- |
| 0.229902 |

Estadísticas tabuladas: Ofloxacino, Columnas de la hoja de trabajo

Filas: Ofloxacino   Columnas: Columnas de la hoja de trabajo

|  | Sonora Gestantes_5 | Sonora No gestantes_5 | Todo |
| --- | --- | --- | --- |
|  |  |  |  |
| Ofloxacina Resistente | 27 | 18 | 45 |
| Ofloxacina Sensible | 23 | 32 | 55 |
| Todo | 50 | 50 | 100 |

*Contenido de la celda
      Conteo*

Prueba exacta de Fisher

| Valor p |
| --- |
| 0.107356 |

Estadísticas tabuladas: Norfloxacino, Columnas de la hoja de trabajo

Filas: Norfloxacino   Columnas: Columnas de la hoja de trabajo

|  | Sonora Gestantes_6 | Sonora No gestantes_6 | Todo |
| --- | --- | --- | --- |
|  |  |  |  |
| Norfloxacina Resistente | 28 | 19 | 47 |
| Norfloxacina Sensible | 22 | 31 | 53 |
| Todo | 50 | 50 | 100 |

*Contenido de la celda
      Conteo*

Prueba exacta de Fisher

| Valor p |
| --- |
| 0.108508 |

Estadísticas tabuladas: Levofloxacino, Columnas de la hoja de trabajo

Filas: Levofloxacino   Columnas: Columnas de la hoja de trabajo

|  | Sonora Gestantes_7 | Sonora No gestantes_7 | Todo |
| --- | --- | --- | --- |
|  |  |  |  |
| Levofloxacina Resistente | 29 | 16 | 45 |
| Levofloxacina Sensible | 21 | 34 | 55 |
| Todo | 50 | 50 | 100 |

*Contenido de la celda
      Conteo*

Prueba exacta de Fisher

| Valor p |
| --- |
| 0.0154245 |

Estadísticas tabuladas: Ampicilina, Columnas de la hoja de trabajo

Filas: Ampicilina   Columnas: Columnas de la hoja de trabajo

|  | Sonora Gestantes_8 | Sonora No gestantes_8 | Todo |
| --- | --- | --- | --- |
|  |  |  |  |
| Ampicilina Resistente | 50 | 50 | 100 |
| Ampicilina Sensible | 0 | 0 | 0 |
| Todo | 50 | 50 | 100 |

*Contenido de la celda
      Conteo*

*** ERROR * No se puede calcular la Prueba exacta de Fisher.**

Estadísticas tabuladas: Cefalotina, Columnas de la hoja de trabajo

Filas: Cefalotina   Columnas: Columnas de la hoja de trabajo

|  | Sonora Gestantes_9 | Sonora No gestantes_9 | Todo |
| --- | --- | --- | --- |
|  |  |  |  |
| Cefalotina Resistente | 48 | 49 | 97 |
| Cefalotina Sensible | 2 | 1 | 3 |
| Todo | 50 | 50 | 100 |

*Contenido de la celda
      Conteo*

Prueba exacta de Fisher

| Valor p |
| --- |
| 1 |

Estadísticas tabuladas: Cefuroxima, Columnas de la hoja de trabajo

Filas: Cefuroxima   Columnas: Columnas de la hoja de trabajo

|  | Sonora Gestantes_10 | Sonora No gestantes_10 | Todo |
| --- | --- | --- | --- |
|  |  |  |  |
| Cefuroxima Resistente | 41 | 50 | 91 |
| Cefuroxima Sensible | 9 | 0 | 9 |
| Todo | 50 | 50 | 100 |

*Contenido de la celda
      Conteo*

Prueba exacta de Fisher

| Valor p |
| --- |
| 0.0026342 |

Estadísticas tabuladas: Ceftazidima, Columnas de la hoja de trabajo

Filas: Ceftazidima   Columnas: Columnas de la hoja de trabajo

|  | Sonora Gestantes_11 | Sonora No gestantes_11 | Todo |
| --- | --- | --- | --- |
|  |  |  |  |
| Ceftazidima Resistente | 37 | 33 | 70 |
| Ceftazidima Sensible | 13 | 17 | 30 |
| Todo | 50 | 50 | 100 |

*Contenido de la celda
      Conteo*

Prueba exacta de Fisher

| Valor p |
| --- |
| 0.513094 |

Estadísticas tabuladas: Cefotaxima, Columnas de la hoja de trabajo

Filas: Cefotaxima   Columnas: Columnas de la hoja de trabajo

|  | Sonora Gestantes_12 | Sonora No gestantes_12 | Todo |
| --- | --- | --- | --- |
|  |  |  |  |
| Cefotaxima Resistente | 35 | 47 | 82 |
| Cefotaxima Sensible | 15 | 3 | 18 |
| Todo | 50 | 50 | 100 |

*Contenido de la celda
      Conteo*

Prueba exacta de Fisher

| Valor p |
| --- |
| 0.0033040 |

Estadísticas tabuladas: Ceftriaxona, Columnas de la hoja de trabajo

Filas: Ceftriaxona   Columnas: Columnas de la hoja de trabajo

|  | Sonora Gestantes_13 | Sonora No gestantes_13 | Todo |
| --- | --- | --- | --- |
|  |  |  |  |
| Ceftriaxona Resistente | 41 | 50 | 91 |
| Ceftriaxona Sensible | 9 | 0 | 9 |
| Todo | 50 | 50 | 100 |

*Contenido de la celda
      Conteo*

Prueba exacta de Fisher

| Valor p |
| --- |
| 0.0026342 |

Estadísticas tabuladas: Cefepime, Columnas de la hoja de trabajo

Filas: Cefepime   Columnas: Columnas de la hoja de trabajo

|  | Sonora Gestantes_14 | Sonora No gestantes_14 | Todo |
| --- | --- | --- | --- |
|  |  |  |  |
| Cefepime Resistente | 19 | 14 | 33 |
| Cefepime Sensible | 31 | 36 | 67 |
| Todo | 50 | 50 | 100 |

*Contenido de la celda
      Conteo*

Prueba exacta de Fisher

| Valor p |
| --- |
| 0.395160 |

Estadísticas tabuladas: Aztreonam, Columnas de la hoja de trabajo

Filas: Aztreonam   Columnas: Columnas de la hoja de trabajo

|  | Sonora Gestantes_15 | Sonora No gestantes_15 | Todo |
| --- | --- | --- | --- |
|  |  |  |  |
| Aztreonam Resistente | 20 | 15 | 35 |
| Aztreonam Sensible | 30 | 35 | 65 |
| Todo | 50 | 50 | 100 |

*Contenido de la celda
      Conteo*

Prueba exacta de Fisher

| Valor p |
| --- |
| 0.401883 |

Estadísticas tabuladas: Amoxicilina-Ácido Clavulánico, ... ja de trabajo

Filas: Amoxicilina-Ácido Clavulánico   Columnas: Columnas de la hoja de trabajo

|  | Sonora Gestantes_16 | Sonora No gestantes_16 | Todo |
| --- | --- | --- | --- |
|  |  |  |  |
| Amoxicilina-Ácido Clavulánico R | 37 | 47 | 84 |
| Amoxicilina-Ácido Clavulánico S | 13 | 3 | 16 |
| Todo | 50 | 50 | 100 |

*Contenido de la celda
      Conteo*

Prueba exacta de Fisher

| Valor p |
| --- |
| 0.0122176 |

Estadísticas tabuladas: Trimetoprim con sulfametoxazol, ... de trabajo

Filas: Trimetoprim con sulfametoxazol   Columnas: Columnas de la hoja de trabajo

|  | Sonora Gestantes_17 | Sonora No gestantes_17 | Todo |
| --- | --- | --- | --- |
|  |  |  |  |
| Trimetoprim con sulfametoxazol | 32 | 35 | 67 |
|  | 18 | 15 | 33 |
| Todo | 50 | 50 | 100 |

*Contenido de la celda
      Conteo*

Prueba exacta de Fisher

| Valor p |
| --- |
| 0.670942 |

Estadísticas tabuladas: Nitrofurantoina, Columnas de la ... a de trabajo

Filas: Nitrofurantoina   Columnas: Columnas de la hoja de trabajo

|  | Sonora Gestantes_18 | Sonora No gestantes_18 | Todo |
| --- | --- | --- | --- |
|  |  |  |  |
| Nitrofurantoina Resistente | 20 | 41 | 61 |
| Nitrofurantoina Sensible | 30 | 9 | 39 |
| Todo | 50 | 50 | 100 |

*Contenido de la celda
      Conteo*

Prueba exacta de Fisher

| Valor p |
| --- |
| 0.0000303 |

Estadísticas tabuladas: Cloramfenicol, Columnas de la hoja de trabajo

Filas: Cloramfenicol   Columnas: Columnas de la hoja de trabajo

|  | Sonora Gestantes_19 | Sonora No gestantes_19 | Todo |
| --- | --- | --- | --- |
|  |  |  |  |
| Cloramfenicol Resistente | 30 | 25 | 55 |
| Cloramfenicol Sensible | 20 | 25 | 45 |
| Todo | 50 | 50 | 100 |

*Contenido de la celda
      Conteo*

Prueba exacta de Fisher

| Valor p |
| --- |
| 0.421552 |

Estadísticas tabuladas: Fosfomicina, Columnas de la hoja de trabajo

Filas: Fosfomicina   Columnas: Columnas de la hoja de trabajo

|  | Sonora Gestantes_20 | Sonora No gestantes_20 | Todo |
| --- | --- | --- | --- |
|  |  |  |  |
| Fosfomicina Resistente | 2 | 2 | 4 |
| Fosfomicina Sensible | 48 | 48 | 96 |
| Todo | 50 | 50 | 100 |

*Contenido de la celda
      Conteo*

Prueba exacta de Fisher

| Valor p |
| --- |
| 1 |

Estadísticas tabuladas: Colistina, Columnas de la hoja de trabajo

Filas: Colistina   Columnas: Columnas de la hoja de trabajo

|  | Sonora Gestantes_21 | Sonora No gestantes_21 | Todo |
| --- | --- | --- | --- |
|  |  |  |  |
| Colistina Resistente | 35 | 34 | 69 |
| Colistina Sensible | 15 | 16 | 31 |
| Todo | 50 | 50 | 100 |

*Contenido de la celda
      Conteo*

Prueba exacta de Fisher

| Valor p |
| --- |
| 1 |

Estadísticas tabuladas: Tetraciclina, Columnas de la hoja de trabajo

Filas: Tetraciclina   Columnas: Columnas de la hoja de trabajo

|  | Sonora Gestantes_22 | Sonora No gestantes_22 | Todo |
| --- | --- | --- | --- |
|  |  |  |  |
| Tetraciclina Resistente | 35 | 29 | 64 |
| Tetraciclina Sensible | 15 | 31 | 46 |
| Todo | 50 | 60 | 110 |

*Contenido de la celda
      Conteo*

Prueba exacta de Fisher

| Valor p |
| --- |
| 0.0323160 |

Estadísticas tabuladas: Ertapenem, Columnas de la hoja de trabajo

Filas: Ertapenem   Columnas: Columnas de la hoja de trabajo

|  | Sonora Gestantes_23 | Sonora No gestantes_23 | Todo |
| --- | --- | --- | --- |
|  |  |  |  |
| Ertapenem Resistente | 6 | 4 | 10 |
| Ertapenem Sensible | 44 | 46 | 90 |
| Todo | 50 | 50 | 100 |

*Contenido de la celda
      Conteo*

Prueba exacta de Fisher

| Valor p |
| --- |
| 0.740666 |
|  |

The same analysis was done for strains from Puebla

Estadísticos descriptivos: Puebla No gestantes, Puebla Gestantes

Estadísticas

| Variable | Media | Error estándar de la media | Desv.Est. | Varianza | Suma | Mínimo | Mediana | Máximo |
| --- | --- | --- | --- | --- | --- | --- | --- | --- |
| Puebla No gestantes | 14.360 | 0.772 | 3.861 | 14.907 | 359.000 | 6.000 | 15.000 | 21.000 |
| Puebla Gestantes | 14.280 | 0.877 | 4.383 | 19.210 | 357.000 | 7.000 | 15.000 | 24.000 |

Prueba T e IC de dos muestras: Puebla No gestantes, Puebla Gestantes

Método

| μ₁: media de Puebla No gestantes |
| --- |
| µ₂: media de Puebla Gestantes |
| Diferencia: μ₁ - µ₂ |

*No se presupuso igualdad de varianzas para este análisis.*

Estadísticas descriptivas

| Muestra | N | Media | Desv.Est. | Error estándar de la media |
| --- | --- | --- | --- | --- |
| Puebla No gestantes | 25 | 14.36 | 3.86 | 0.77 |
| Puebla Gestantes | 25 | 14.28 | 4.38 | 0.88 |

Estimación de la diferencia

| Diferencia | IC de 95% para la diferencia |
| --- | --- |
| 0.08 | (-2.27, 2.43) |

Prueba

| Hipótesis nula | H₀: μ₁ - µ₂ = 0 |
| --- | --- |
| Hipótesis alterna | H₁: μ₁ - µ₂ ≠ 0 |

| Valor T | GL | Valor p |
| --- | --- | --- |
| 0.07 | 47 | 0.946 |

Estadísticas tabuladas: AMIKACINA, Columnas de la hoja de trabajo

Filas: AMIKACINA   Columnas: Columnas de la hoja de trabajo

|  | Puebla Gestantes | Puebla No gestantes | Todo |
| --- | --- | --- | --- |
|  |  |  |  |
| Amikacina Resistente | 24 | 19 | 43 |
| Amikacina Sensible | 1 | 6 | 7 |
| Todo | 25 | 25 | 50 |

*Contenido de la celda
      Conteo*

Prueba exacta de Fisher

| Valor p |
| --- |
| 0.0982776 |

Estadísticas tabuladas: GENTAMICINA, Columnas de la hoja de trabajo

Filas: GENTAMICINA   Columnas: Columnas de la hoja de trabajo

|  | Puebla Gestantes_1 | Puebla No gestantes_1 | Todo |
| --- | --- | --- | --- |
|  |  |  |  |
| Gentamicina Resistente | 14 | 10 | 24 |
| Gentamicina Sensible | 11 | 15 | 26 |
| Todo | 25 | 25 | 50 |

*Contenido de la celda
      Conteo*

Prueba exacta de Fisher

| Valor p |
| --- |
| 0.396104 |

Estadísticas tabuladas: NETILMICINA, Columnas de la hoja de trabajo

Filas: NETILMICINA   Columnas: Columnas de la hoja de trabajo

|  | Puebla Gestantes_2 | Puebla No gestantes_2 | Todo |
| --- | --- | --- | --- |
|  |  |  |  |
| Netilmicina Resistente | 6 | 5 | 11 |
| Netilmicina Sensible | 19 | 20 | 39 |
| Todo | 25 | 25 | 50 |

*Contenido de la celda
      Conteo*

Prueba exacta de Fisher

| Valor p |
| --- |
| 1 |

Estadísticas tabuladas: ÁCIDO NALIDIXICO, Columnas de ... de trabajo

Filas: ÁCIDO NALIDIXICO   Columnas: Columnas de la hoja de trabajo

|  | Puebla Gestantes_3 | Puebla No gestantes_3 | Todo |
| --- | --- | --- | --- |
|  |  |  |  |
| Ácido nalidixico Resistente | 17 | 18 | 35 |
| Ácido nalidixico Sensible | 8 | 7 | 15 |
| Todo | 25 | 25 | 50 |

*Contenido de la celda
      Conteo*

Prueba exacta de Fisher

| Valor p |
| --- |
| 1 |

Estadísticas tabuladas: CIPROFLOXACINO, Columnas de ... a de trabajo

Filas: CIPROFLOXACINO   Columnas: Columnas de la hoja de trabajo

|  | Puebla Gestantes_4 | Puebla No gestantes_4 | Todo |
| --- | --- | --- | --- |
|  |  |  |  |
| Ciprofloxacina Resistente | 10 | 13 | 23 |
| Ciprofloxacina Sensible | 15 | 12 | 27 |
| Todo | 25 | 25 | 50 |

*Contenido de la celda
      Conteo*

Prueba exacta de Fisher

| Valor p |
| --- |
| 0.570916 |

Estadísticas tabuladas: OFLOXACINO, Columnas de la hoja de trabajo

Filas: OFLOXACINO   Columnas: Columnas de la hoja de trabajo

|  | Puebla Gestantes_5 | Puebla No gestantes_5 | Todo |
| --- | --- | --- | --- |
|  |  |  |  |
| Ofloxacina Resistente | 12 | 14 | 26 |
| Ofloxacina Sensible | 13 | 11 | 24 |
| Todo | 25 | 25 | 50 |

*Contenido de la celda
      Conteo*

Prueba exacta de Fisher

| Valor p |
| --- |
| 0.777512 |

Estadísticas tabuladas: NORFLOXACINO, Columnas de la ... de trabajo

Filas: NORFLOXACINO   Columnas: Columnas de la hoja de trabajo

|  | Puebla Gestantes_6 | Puebla No gestantes_6 | Todo |
| --- | --- | --- | --- |
|  |  |  |  |
| Norfloxacina Resistente | 8 | 14 | 22 |
| Norfloxacina Sensible | 17 | 11 | 28 |
| Todo | 25 | 25 | 50 |

*Contenido de la celda
      Conteo*

Prueba exacta de Fisher

| Valor p |
| --- |
| 0.153647 |

Estadísticas tabuladas: LEVOFLOXACINO, Columnas de la ... de trabajo

Filas: LEVOFLOXACINO   Columnas: Columnas de la hoja de trabajo

|  | Puebla Gestantes_7 | Puebla No gestantes_7 | Todo |
| --- | --- | --- | --- |
|  |  |  |  |
| Levofloxacina Resistente | 8 | 11 | 19 |
| Levofloxacina Sensible | 17 | 14 | 31 |
| Todo | 25 | 25 | 50 |

*Contenido de la celda
      Conteo*

Prueba exacta de Fisher

| Valor p |
| --- |
| 0.560744 |

Estadísticas tabuladas: AMPICILINA, Columnas de la hoja de trabajo

Filas: AMPICILINA   Columnas: Columnas de la hoja de trabajo

|  | Puebla Gestantes_8 | Puebla No gestantes_8 | Todo |
| --- | --- | --- | --- |
|  |  |  |  |
| Ampicilina Resistente | 25 | 25 | 50 |
| Ampicilina Sensible | 0 | 0 | 0 |
| Todo | 25 | 25 | 50 |

*Contenido de la celda
      Conteo*

*** ERROR * No se puede calcular la Prueba exacta de Fisher.**

Estadísticas tabuladas: CEFALOTINA, Columnas de la hoja de trabajo

Filas: CEFALOTINA   Columnas: Columnas de la hoja de trabajo

|  | Puebla Gestantes_9 | Puebla No gestantes_9 | Todo |
| --- | --- | --- | --- |
|  |  |  |  |
| Cefalotina Resistente | 24 | 25 | 49 |
| Cefalotina Sensible | 1 | 0 | 1 |
| Todo | 25 | 25 | 50 |

*Contenido de la celda
      Conteo*

Prueba exacta de Fisher

| Valor p |
| --- |
| 1 |

Estadísticas tabuladas: CEFUROXIMA, Columnas de la hoja de trabajo

Filas: CEFUROXIMA   Columnas: Columnas de la hoja de trabajo

|  | Puebla Gestantes_10 | Puebla No gestantes_10 | Todo |
| --- | --- | --- | --- |
|  |  |  |  |
| Cefuroxima Resistente | 25 | 23 | 48 |
| Cefuroxima Sensible | 0 | 2 | 2 |
| Todo | 25 | 25 | 50 |

*Contenido de la celda
      Conteo*

Prueba exacta de Fisher

| Valor p |
| --- |
| 0.489796 |

Estadísticas tabuladas: CEFTAZIDIMA, Columnas de la hoja de trabajo

Filas: CEFTAZIDIMA   Columnas: Columnas de la hoja de trabajo

|  | Puebla Gestantes_11 | Puebla No gestantes_11 | Todo |
| --- | --- | --- | --- |
|  |  |  |  |
| Ceftazidima Resistente | 21 | 19 | 40 |
| Ceftazidima Sensible | 4 | 6 | 10 |
| Todo | 25 | 25 | 50 |

*Contenido de la celda
      Conteo*

Prueba exacta de Fisher

| Valor p |
| --- |
| 0.725202 |

Estadísticas tabuladas: CEFOTAXIMA, Columnas de la hoja de trabajo

Filas: CEFOTAXIMA   Columnas: Columnas de la hoja de trabajo

|  | Puebla Gestantes_12 | Puebla No gestantes_12 | Todo |
| --- | --- | --- | --- |
|  |  |  |  |
| Cefotaxima Resistente | 20 | 20 | 40 |
| Cefotaxima Sensible | 5 | 5 | 10 |
| Todo | 25 | 25 | 50 |

*Contenido de la celda
      Conteo*

Prueba exacta de Fisher

| Valor p |
| --- |
| 1 |

Estadísticas tabuladas: CEFTRIAXONA, Columnas de la hoja de trabajo

Filas: CEFTRIAXONA   Columnas: Columnas de la hoja de trabajo

|  | Puebla Gestantes_13 | Puebla No gestantes_13 | Todo |
| --- | --- | --- | --- |
|  |  |  |  |
| Ceftriaxona Resistente | 24 | 24 | 48 |
| Ceftriaxona Sensible | 1 | 1 | 2 |
| Todo | 25 | 25 | 50 |

*Contenido de la celda
      Conteo*

Prueba exacta de Fisher

| Valor p |
| --- |
| 1 |

Estadísticas tabuladas: CEFEPIME, Columnas de la hoja de trabajo

Filas: CEFEPIME   Columnas: Columnas de la hoja de trabajo

|  | Puebla Gestantes_14 | Puebla No gestantes_14 | Todo |
| --- | --- | --- | --- |
|  |  |  |  |
| Cefepime Resistente | 8 | 6 | 14 |
| Cefepime Sensible | 17 | 19 | 36 |
| Todo | 25 | 25 | 50 |

*Contenido de la celda
      Conteo*

Prueba exacta de Fisher

| Valor p |
| --- |
| 0.753614 |

Estadísticas tabuladas: AZTREONAM, Columnas de la hoja de trabajo

Filas: AZTREONAM   Columnas: Columnas de la hoja de trabajo

|  | Puebla Gestantes_15 | Puebla No gestantes_15 | Todo |
| --- | --- | --- | --- |
|  |  |  |  |
| Aztreonam Resistente | 15 | 11 | 26 |
| Aztreonam Sensible | 10 | 14 | 24 |
| Todo | 25 | 25 | 50 |

*Contenido de la celda
      Conteo*

Prueba exacta de Fisher

| Valor p |
| --- |
| 0.396104 |

Estadísticas tabuladas: AMOXICILINA-ÁCIDO ... s de la hoja de trabajo

Filas: AMOXICILINA-ÁCIDO CLAVULÁNICO   Columnas: Columnas de la hoja de trabajo

|  | Puebla Gestantes_16 | Puebla No gestantes_16 | Todo |
| --- | --- | --- | --- |
|  |  |  |  |
| Amoxicilina-Ácido Clavulánico R | 23 | 21 | 44 |
| Amoxicilina-Ácido Clavulánico S | 2 | 4 | 6 |
| Todo | 25 | 25 | 50 |

*Contenido de la celda
      Conteo*

Prueba exacta de Fisher

| Valor p |
| --- |
| 0.667101 |

Estadísticas tabuladas: TRIMETOPRIM CON ... nas de la hoja de trabajo

Filas: TRIMETOPRIM CON SULFAMETOXAZOL   Columnas: Columnas de la hoja de trabajo

|  | Puebla Gestantes_17 | Puebla No gestantes_17 | Todo |
| --- | --- | --- | --- |
|  |  |  |  |
| Trimetoprim con sulfametoxazol | 11 | 17 | 28 |
|  | 14 | 8 | 22 |
| Todo | 25 | 25 | 50 |

*Contenido de la celda
      Conteo*

Prueba exacta de Fisher

| Valor p |
| --- |
| 0.153647 |

Estadísticas tabuladas: NITROFURANTOINA, Columnas ... ja de trabajo

Filas: NITROFURANTOINA   Columnas: Columnas de la hoja de trabajo

|  | Puebla Gestantes_18 | Puebla No gestantes_18 | Todo |
| --- | --- | --- | --- |
|  |  |  |  |
| Nitrofurantoina Resistente | 16 | 17 | 33 |
| Nitrofurantoina Sensible | 9 | 8 | 17 |
| Todo | 25 | 25 | 50 |

*Contenido de la celda
      Conteo*

Prueba exacta de Fisher

| Valor p |
| --- |
| 1 |

Estadísticas tabuladas: CLORAMFENICOL, Columnas de ... ja de trabajo

Filas: CLORAMFENICOL   Columnas: Columnas de la hoja de trabajo

|  | Puebla Gestantes_19 | Puebla No gestantes_19 | Todo |
| --- | --- | --- | --- |
|  |  |  |  |
| Cloramfenicol Resistente | 9 | 11 | 20 |
| Cloramfenicol Sensible | 16 | 14 | 30 |
| Todo | 25 | 25 | 50 |

*Contenido de la celda
      Conteo*

Prueba exacta de Fisher

| Valor p |
| --- |
| 0.773287 |

Estadísticas tabuladas: FOSFOMICINA, Columnas de la hoja de trabajo

Filas: FOSFOMICINA   Columnas: Columnas de la hoja de trabajo

|  | Puebla Gestantes_20 | Puebla No gestantes_20 | Todo |
| --- | --- | --- | --- |
|  |  |  |  |
| Fosfomicina Resistente | 5 | 1 | 6 |
| Fosfomicina Sensible | 20 | 24 | 44 |
| Todo | 25 | 25 | 50 |

*Contenido de la celda
      Conteo*

Prueba exacta de Fisher

| Valor p |
| --- |
| 0.189463 |

Estadísticas tabuladas: COLISTINA, Columnas de la hoja de trabajo

Filas: COLISTINA   Columnas: Columnas de la hoja de trabajo

|  | Puebla Gestantes_21 | Puebla No gestantes_21 | Todo |
| --- | --- | --- | --- |
|  |  |  |  |
| Colistina Resistente | 14 | 17 | 31 |
| Colistina Sensible | 11 | 8 | 19 |
| Todo | 25 | 25 | 50 |

*Contenido de la celda
      Conteo*

Prueba exacta de Fisher

| Valor p |
| --- |
| 0.560744 |

Estadísticas tabuladas: TETRACICLINA, Columnas de la hoja de trabajo

Filas: TETRACICLINA   Columnas: Columnas de la hoja de trabajo

|  | Puebla Gestantes_22 | Puebla No gestantes_22 | Todo |
| --- | --- | --- | --- |
|  |  |  |  |
| Tetraciclina Resistente | 13 | 18 | 31 |
| Tetraciclina Sensible | 12 | 7 | 19 |
| Todo | 25 | 25 | 50 |

*Contenido de la celda
      Conteo*

Prueba exacta de Fisher

| Valor p |
| --- |
| 0.243634 |

Estadísticas tabuladas: ERTAPENEM, Columnas de la hoja de trabajo

Filas: ERTAPENEM   Columnas: Columnas de la hoja de trabajo

|  | Puebla Gestantes_23 | Puebla No gestantes_23 | Todo |
| --- | --- | --- | --- |
|  |  |  |  |
| Ertapenem Resistente | 5 | 0 | 5 |
| Ertapenem Sensible | 20 | 25 | 45 |
| Todo | 25 | 25 | 50 |

*Contenido de la celda
      Conteo*

Prueba exacta de Fisher

| Valor p |
| --- |
| 0.0501520 |

Then we compare the resistance between geographic area (pregnant from Sonora vs pregnant from Puebla and non-pregnant from Sonora vs non-pregnant from Puebla) and again we use fisher test exact.

**Analysis of resistance between geographic area (pregnant women)**

Estadísticos descriptivos: Sonora Gestantes, Puebla Gestantes

Estadísticas

| Variable | Media | Error estándar de la media | Varianza | Suma | Mínimo | Mediana | Máximo |
| --- | --- | --- | --- | --- | --- | --- | --- |
| Sonora Gestantes | 13.700 | 0.747 | 27.888 | 685.000 | 3.000 | 12.500 | 22.000 |
| Puebla Gestantes | 14.280 | 0.877 | 19.210 | 357.000 | 7.000 | 15.000 | 24.000 |

Prueba T de dos muestras e IC

T DE DOS MUESTRAS PARA RESISTENCIA DE SONORA GESTANTES VS PUEBLA GESTANTES

Método

| μ₁: media de la muestra 1 |
| --- |
| µ₂: media de la muestra 2 |
| Diferencia: μ₁ - µ₂ |

*No se presupuso igualdad de varianzas para este análisis.*

Estadísticas descriptivas

| Muestra | N | Media | Desv.Est. | Error estándar de la media |
| --- | --- | --- | --- | --- |
| Muestra 1 | 25 | 14.17 | 4.38 | 0.88 |
| Muestra 2 | 50 | 13.80 | 5.28 | 0.75 |

Estimación de la diferencia

| Diferencia | IC de 95% para la diferencia |
| --- | --- |
| 0.38 | (-1.93, 2.69) |

Prueba

| Hipótesis nula | H₀: μ₁ - µ₂ = 0 |
| --- | --- |
| Hipótesis alterna | H₁: μ₁ - µ₂ ≠ 0 |

| Valor T | GL | Valor p |
| --- | --- | --- |
| 0.33 | 56 | 0.743 |

Estadísticas tabuladas: AMIKACINA, Columnas de la hoja de trabajo

Filas: AMIKACINA   Columnas: Columnas de la hoja de trabajo

|  | Sonora Gestantes | Puebla Gestantes | Todo |
| --- | --- | --- | --- |
|  |  |  |  |
| Amikacina Resistente | 31 | 24 | 55 |
| Amikacina Sensible | 19 | 1 | 20 |
| Todo | 50 | 25 | 75 |

*Contenido de la celda
      Conteo*

Prueba exacta de Fisher

| Valor p |
| --- |
| 0.0017493 |

Estadísticas tabuladas: GENTAMICINA, Columnas de la hoja de trabajo

Filas: GENTAMICINA   Columnas: Columnas de la hoja de trabajo

|  | Sonora Gestantes_1 | Puebla Gestantes_1 | Todo |
| --- | --- | --- | --- |
|  |  |  |  |
| Gentamicina Resistente | 21 | 14 | 35 |
| Gentamicina Sensible | 29 | 11 | 40 |
| Todo | 50 | 25 | 75 |

*Contenido de la celda
      Conteo*

Prueba exacta de Fisher

| Valor p |
| --- |
| 0.327681 |

Estadísticas tabuladas: NETILMICINA, Columnas de la hoja de trabajo

Filas: NETILMICINA   Columnas: Columnas de la hoja de trabajo

|  | Sonora Gestantes_2 | Puebla Gestantes_2 | Todo |
| --- | --- | --- | --- |
|  |  |  |  |
| Netilmicina Resistente | 5 | 6 | 11 |
| Netilmicina Sensible | 45 | 19 | 64 |
| Todo | 50 | 25 | 75 |

*Contenido de la celda
      Conteo*

Prueba exacta de Fisher

| Valor p |
| --- |
| 0.164134 |

Estadísticas tabuladas: ÁCIDO NALIDIXICO, Columnas de ... de trabajo

Filas: ÁCIDO NALIDIXICO   Columnas: Columnas de la hoja de trabajo

|  | Sonora Gestantes_3 | Puebla Gestantes_3 | Todo |
| --- | --- | --- | --- |
|  |  |  |  |
| Ácido nalidixico Resistente | 37 | 17 | 54 |
| Ácido nalidixico Sensible | 13 | 8 | 21 |
| Todo | 50 | 25 | 75 |

*Contenido de la celda
      Conteo*

Prueba exacta de Fisher

| Valor p |
| --- |
| 0.596183 |

Estadísticas tabuladas: CIPROFLOXACINO, Columnas de ... a de trabajo

Filas: CIPROFLOXACINO   Columnas: Columnas de la hoja de trabajo

|  | Sonora Gestantes_4 | Puebla Gestantes_4 | Todo |
| --- | --- | --- | --- |
|  |  |  |  |
| Ciprofloxacina Resistente | 29 | 10 | 39 |
| Ciprofloxacina Sensible | 21 | 15 | 36 |
| Todo | 50 | 25 | 75 |

*Contenido de la celda
      Conteo*

Prueba exacta de Fisher

| Valor p |
| --- |
| 0.152476 |

Estadísticas tabuladas: OFLOXACINO, Columnas de la hoja de trabajo

Filas: OFLOXACINO   Columnas: Columnas de la hoja de trabajo

|  | Sonora Gestantes_5 | Puebla Gestantes_5 | Todo |
| --- | --- | --- | --- |
|  |  |  |  |
| Ofloxacina Resistente | 27 | 12 | 39 |
| Ofloxacina Sensible | 23 | 13 | 36 |
| Todo | 50 | 25 | 75 |

*Contenido de la celda
      Conteo*

Prueba exacta de Fisher

| Valor p |
| --- |
| 0.634340 |

Estadísticas tabuladas: NORFLOXACINO, Columnas de la ... de trabajo

Filas: NORFLOXACINO   Columnas: Columnas de la hoja de trabajo

|  | Sonora Gestantes_6 | Puebla Gestantes_6 | Todo |
| --- | --- | --- | --- |
|  |  |  |  |
| Norfloxacina Resistente | 28 | 8 | 36 |
| Norfloxacina Sensible | 22 | 17 | 39 |
| Todo | 50 | 25 | 75 |

*Contenido de la celda
      Conteo*

Prueba exacta de Fisher

| Valor p |
| --- |
| 0.0557165 |

Estadísticas tabuladas: LEVOFLOXACINO, Columnas de la ... de trabajo

Filas: LEVOFLOXACINO   Columnas: Columnas de la hoja de trabajo

|  | Sonora Gestantes_7 | Puebla Gestantes_7 | Todo |
| --- | --- | --- | --- |
|  |  |  |  |
| Levofloxacina Resistente | 29 | 8 | 37 |
| Levofloxacina Sensible | 21 | 17 | 38 |
| Todo | 50 | 25 | 75 |

*Contenido de la celda
      Conteo*

Prueba exacta de Fisher

| Valor p |
| --- |
| 0.0497151 |

Estadísticas tabuladas: AMPICILINA, Columnas de la hoja de trabajo

Filas: AMPICILINA   Columnas: Columnas de la hoja de trabajo

|  | Sonora Gestantes_8 | Puebla Gestantes_8 | Todo |
| --- | --- | --- | --- |
|  |  |  |  |
| Ampicilina Resistente | 50 | 25 | 75 |
| Ampicilina Sensible | 0 | 0 | 0 |
| Todo | 50 | 25 | 75 |

*Contenido de la celda
      Conteo*

*** ERROR * No se puede calcular la Prueba exacta de Fisher.**

Estadísticas tabuladas: CEFALOTINA, Columnas de la hoja de trabajo

Filas: CEFALOTINA   Columnas: Columnas de la hoja de trabajo

|  | Sonora Gestantes_9 | Puebla Gestantes_9 | Todo |
| --- | --- | --- | --- |
|  |  |  |  |
| Cefalotina Resistente | 48 | 24 | 72 |
| Cefalotina Sensible | 2 | 1 | 3 |
| Todo | 50 | 25 | 75 |

*Contenido de la celda
      Conteo*

Prueba exacta de Fisher

| Valor p |
| --- |
| 1 |

Estadísticas tabuladas: CEFUROXIMA, Columnas de la hoja de trabajo

Filas: CEFUROXIMA   Columnas: Columnas de la hoja de trabajo

|  | Sonora Gestantes_10 | Puebla Gestantes_10 | Todo |
| --- | --- | --- | --- |
|  |  |  |  |
| Cefuroxima Resistente | 41 | 25 | 66 |
| Cefuroxima Sensible | 9 | 0 | 9 |
| Todo | 50 | 25 | 75 |

*Contenido de la celda
      Conteo*

Prueba exacta de Fisher

| Valor p |
| --- |
| 0.0250838 |

Estadísticas tabuladas: CEFTAZIDIMA, Columnas de la hoja de trabajo

Filas: CEFTAZIDIMA   Columnas: Columnas de la hoja de trabajo

|  | Sonora Gestantes_11 | Puebla Gestantes_11 | Todo |
| --- | --- | --- | --- |
|  |  |  |  |
| Ceftazidima Resistente | 37 | 21 | 58 |
| Ceftazidima Sensible | 13 | 4 | 17 |
| Todo | 50 | 25 | 75 |

*Contenido de la celda
      Conteo*

Prueba exacta de Fisher

| Valor p |
| --- |
| 0.393294 |

Estadísticas tabuladas: CEFOTAXIMA, Columnas de la hoja de trabajo

Filas: CEFOTAXIMA   Columnas: Columnas de la hoja de trabajo

|  | Sonora Gestantes_12 | Puebla Gestantes_12 | Todo |
| --- | --- | --- | --- |
|  |  |  |  |
| Cefotaxima Resistente | 35 | 20 | 55 |
| Cefotaxima Sensible | 15 | 5 | 20 |
| Todo | 50 | 25 | 75 |

*Contenido de la celda
      Conteo*

Prueba exacta de Fisher

| Valor p |
| --- |
| 0.417336 |

Estadísticas tabuladas: CEFTRIAXONA, Columnas de la hoja de trabajo

Filas: CEFTRIAXONA   Columnas: Columnas de la hoja de trabajo

|  | Sonora Gestantes_13 | Puebla Gestantes_13 | Todo |
| --- | --- | --- | --- |
|  |  |  |  |
| Ceftriaxona Resistente | 41 | 24 | 65 |
| Ceftriaxona Sensible | 9 | 1 | 10 |
| Todo | 50 | 25 | 75 |

*Contenido de la celda
      Conteo*

Prueba exacta de Fisher

| Valor p |
| --- |
| 0.150249 |

Estadísticas tabuladas: CEFEPIME, Columnas de la hoja de trabajo

Filas: CEFEPIME   Columnas: Columnas de la hoja de trabajo

|  | Sonora Gestantes_14 | Puebla Gestantes_14 | Todo |
| --- | --- | --- | --- |
|  |  |  |  |
| Cefepime Resistente | 19 | 8 | 27 |
| Cefepime Sensible | 31 | 17 | 48 |
| Todo | 50 | 25 | 75 |

*Contenido de la celda
      Conteo*

Prueba exacta de Fisher

| Valor p |
| --- |
| 0.799042 |

Estadísticas tabuladas: CEFEPIME, Columnas de la hoja de trabajo

Filas: CEFEPIME   Columnas: Columnas de la hoja de trabajo

|  | Sonora Gestantes_14 | Puebla Gestantes_14 | Todo |
| --- | --- | --- | --- |
|  |  |  |  |
| Cefepime Resistente | 19 | 8 | 27 |
| Cefepime Sensible | 31 | 17 | 48 |
| Todo | 50 | 25 | 75 |

*Contenido de la celda
      Conteo*

Prueba exacta de Fisher

| Valor p |
| --- |
| 0.799042 |

Estadísticas tabuladas: AZTREONAM, Columnas de la hoja de trabajo

Filas: AZTREONAM   Columnas: Columnas de la hoja de trabajo

|  | Sonora Gestantes_15 | Puebla Gestantes_15 | Todo |
| --- | --- | --- | --- |
|  |  |  |  |
| Aztreonam Resistente | 20 | 15 | 35 |
| Aztreonam Sensible | 30 | 10 | 40 |
| Todo | 50 | 25 | 75 |

*Contenido de la celda
      Conteo*

Prueba exacta de Fisher

| Valor p |
| --- |
| 0.141307 |

Estadísticas tabuladas: AMOXICILINA-ÁCIDO ... s de la hoja de trabajo

Filas: AMOXICILINA-ÁCIDO CLAVULÁNICO   Columnas: Columnas de la hoja de trabajo

|  | Sonora Gestantes_16 | Puebla Gestantes_16 | Todo |
| --- | --- | --- | --- |
|  |  |  |  |
| Amoxicilina-Ácido Clavulánico R | 37 | 23 | 60 |
| Amoxicilina-Ácido Clavulánico S | 13 | 2 | 15 |
| Todo | 50 | 25 | 75 |

*Contenido de la celda
      Conteo*

Prueba exacta de Fisher

| Valor p |
| --- |
| 0.0757365 |

Estadísticas tabuladas: TRIMETOPRIM CON ... nas de la hoja de trabajo

Filas: TRIMETOPRIM CON SULFAMETOXAZOL   Columnas: Columnas de la hoja de trabajo

|  | Sonora Gestantes_17 | Puebla Gestantes_17 | Todo |
| --- | --- | --- | --- |
|  |  |  |  |
| Trimetoprim con sulfametoxazol | 32 | 11 | 43 |
|  | 18 | 14 | 32 |
| Todo | 50 | 25 | 75 |

*Contenido de la celda
      Conteo*

Prueba exacta de Fisher

| Valor p |
| --- |
| 0.137766 |

Estadísticas tabuladas: NITROFURANTOINA, Columnas ... ja de trabajo

Filas: NITROFURANTOINA   Columnas: Columnas de la hoja de trabajo

|  | Sonora Gestantes_18 | Puebla Gestantes_18 | Todo |
| --- | --- | --- | --- |
|  |  |  |  |
| Nitrofurantoina Resistente | 20 | 16 | 36 |
| Nitrofurantoina Sensible | 30 | 9 | 39 |
| Todo | 50 | 25 | 75 |

*Contenido de la celda
      Conteo*

Prueba exacta de Fisher

| Valor p |
| --- |
| 0.0851649 |

Estadísticas tabuladas: CLORAMFENICOL, Columnas de ... ja de trabajo

Filas: CLORAMFENICOL   Columnas: Columnas de la hoja de trabajo

|  | Sonora Gestantes_19 | Puebla Gestantes_19 | Todo |
| --- | --- | --- | --- |
|  |  |  |  |
| Cloramfenicol Resistente | 30 | 9 | 39 |
| Cloramfenicol Sensible | 20 | 16 | 36 |
| Todo | 50 | 25 | 75 |

*Contenido de la celda
      Conteo*

Prueba exacta de Fisher

| Valor p |
| --- |
| 0.0851649 |

Estadísticas tabuladas: FOSFOMICINA, Columnas de la hoja de trabajo

Filas: FOSFOMICINA   Columnas: Columnas de la hoja de trabajo

|  | Sonora Gestantes_20 | Puebla Gestantes_20 | Todo |
| --- | --- | --- | --- |
|  |  |  |  |
| Fosfomicina Resistente | 2 | 5 | 7 |
| Fosfomicina Sensible | 48 | 20 | 68 |
| Todo | 50 | 25 | 75 |

*Contenido de la celda
      Conteo*

Prueba exacta de Fisher

| Valor p |
| --- |
| 0.0374944 |

Estadísticas tabuladas: COLISTINA, Columnas de la hoja de trabajo

Filas: COLISTINA   Columnas: Columnas de la hoja de trabajo

|  | Sonora Gestantes_21 | Puebla Gestantes_21 | Todo |
| --- | --- | --- | --- |
|  |  |  |  |
| Colistina Resistente | 35 | 14 | 49 |
| Colistina Sensible | 15 | 11 | 26 |
| Todo | 50 | 25 | 75 |

*Contenido de la celda
      Conteo*

Prueba exacta de Fisher

| Valor p |
| --- |
| 0.304327 |

Estadísticas tabuladas: TETRACICLINA, Columnas de la hoja de trabajo

Filas: TETRACICLINA   Columnas: Columnas de la hoja de trabajo

|  | Sonora Gestantes_22 | Puebla Gestantes_22 | Todo |
| --- | --- | --- | --- |
|  |  |  |  |
| Tetraciclina Resistente | 35 | 13 | 48 |
| Tetraciclina Sensible | 15 | 12 | 27 |
| Todo | 50 | 25 | 75 |

*Contenido de la celda
      Conteo*

Prueba exacta de Fisher

| Valor p |
| --- |
| 0.136497 |

Estadísticas tabuladas: ERTAPENEM, Columnas de la hoja de trabajo

Filas: ERTAPENEM   Columnas: Columnas de la hoja de trabajo

|  | Sonora Gestantes_23 | Puebla Gestantes_23 | Todo |
| --- | --- | --- | --- |
|  |  |  |  |
| Ertapenem Resistente | 6 | 5 | 11 |
| Ertapenem Sensible | 44 | 20 | 64 |
| Todo | 50 | 25 | 75 |

*Contenido de la celda
      Conteo*

Prueba exacta de Fisher

| Valor p |
| --- |
| 0.489947 |

**Analysis of resistance between geographic area (Non-pregnant women)**

Estadísticos descriptivos: Sonora No gestantes, Puebla No gestantes

Estadísticas

| Variable | Media | Error estándar de la media | Varianza | Suma | Mínimo | Mediana | Máximo |
| --- | --- | --- | --- | --- | --- | --- | --- |
| Sonora No gestantes | 13.880 | 0.483 | 11.659 | 694.000 | 6.000 | 14.000 | 21.000 |
| Puebla No gestantes | 14.360 | 0.772 | 14.907 | 359.000 | 6.000 | 15.000 | 21.000 |

Prueba T de dos muestras e IC

T DE DOS MUESTRAS PARA RESISTENCIA ENTRE SONORA NO GESTANTES VS PUEBLA NO GESTANTES

Método

| μ₁: media de la muestra 1 |
| --- |
| µ₂: media de la muestra 2 |
| Diferencia: μ₁ - µ₂ |

*No se presupuso igualdad de varianzas para este análisis.*

Estadísticas descriptivas

| Muestra | N | Media | Desv.Est. | Error estándar de la media |
| --- | --- | --- | --- | --- |
| Muestra 1 | 25 | 14.36 | 3.86 | 0.77 |
| Muestra 2 | 50 | 13.88 | 3.41 | 0.48 |

Estimación de la diferencia

| Diferencia | IC de 95% para la diferencia |
| --- | --- |
| 0.480 | (-1.357, 2.317) |

Prueba

| Hipótesis nula | H₀: μ₁ - µ₂ = 0 |
| --- | --- |
| Hipótesis alterna | H₁: μ₁ - µ₂ ≠ 0 |

| Valor T | GL | Valor p |
| --- | --- | --- |
| 0.53 | 43 | 0.601 |

Estadísticas tabuladas: AMIKACINA, Columnas de la hoja de trabajo

Filas: AMIKACINA   Columnas: Columnas de la hoja de trabajo

|  | Puebla No gestantes | Sonora No gestantes | Todo |
| --- | --- | --- | --- |
|  |  |  |  |
| Amikacina Resistente | 19 | 32 | 51 |
| Amikacina Sensible | 6 | 18 | 24 |
| Todo | 25 | 50 | 75 |

*Contenido de la celda
      Conteo*

Prueba exacta de Fisher

| Valor p |
| --- |
| 0.431416 |

Estadísticas tabuladas: GENTAMICINA, Columnas de la hoja de trabajo

Filas: GENTAMICINA   Columnas: Columnas de la hoja de trabajo

|  | Puebla No gestantes_1 | Sonora No gestantes_1 | Todo |
| --- | --- | --- | --- |
|  |  |  |  |
| Gentamicina Resistente | 10 | 22 | 32 |
| Gentamicina Sensible | 15 | 28 | 43 |
| Todo | 25 | 50 | 75 |

*Contenido de la celda
      Conteo*

Prueba exacta de Fisher

| Valor p |
| --- |
| 0.807699 |

Estadísticas tabuladas: NETILMICINA, Columnas de la hoja de trabajo

Filas: NETILMICINA   Columnas: Columnas de la hoja de trabajo

|  | Puebla No gestantes_2 | Sonora No gestantes_2 | Todo |
| --- | --- | --- | --- |
|  |  |  |  |
| Netilmicina Resistente | 5 | 2 | 7 |
| Netilmicina Sensible | 20 | 48 | 68 |
| Todo | 25 | 50 | 75 |

*Contenido de la celda
      Conteo*

Prueba exacta de Fisher

| Valor p |
| --- |
| 0.0374944 |

Estadísticas tabuladas: ÁCIDO NALIDIXICO, Columnas de ... de trabajo

Filas: ÁCIDO NALIDIXICO   Columnas: Columnas de la hoja de trabajo

|  | Puebla No gestantes_3 | Sonora No gestantes_3 | Todo |
| --- | --- | --- | --- |
|  |  |  |  |
| Ácido nalidixico Resistente | 18 | 37 | 55 |
| Ácido nalidixico Sensible | 7 | 13 | 20 |
| Todo | 25 | 50 | 75 |

*Contenido de la celda
      Conteo*

Prueba exacta de Fisher

| Valor p |
| --- |
| 1 |

Estadísticas tabuladas: CIPROFLOXACINA, Columnas de ... a de trabajo

Filas: CIPROFLOXACINA   Columnas: Columnas de la hoja de trabajo

|  | Puebla No gestantes_4 | Sonora No gestantes_4 | Todo |
| --- | --- | --- | --- |
|  |  |  |  |
| Ciprofloxacina Resistente | 13 | 22 | 35 |
| Ciprofloxacina Sensible | 12 | 28 | 40 |
| Todo | 25 | 50 | 75 |

*Contenido de la celda
      Conteo*

Prueba exacta de Fisher

| Valor p |
| --- |
| 0.624943 |

Estadísticas tabuladas: OFLOXACINA, Columnas de la hoja de trabajo

Filas: OFLOXACINA   Columnas: Columnas de la hoja de trabajo

|  | Puebla No gestantes_5 | Sonora No gestantes_5 | Todo |
| --- | --- | --- | --- |
|  |  |  |  |
| Ofloxacina Resistente | 14 | 18 | 32 |
| Ofloxacina Sensible | 11 | 32 | 43 |
| Todo | 25 | 50 | 75 |

*Contenido de la celda
      Conteo*

Prueba exacta de Fisher

| Valor p |
| --- |
| 0.137766 |

Estadísticas tabuladas: NORFLOXACINA, Columnas de la ... de trabajo

Filas: NORFLOXACINA   Columnas: Columnas de la hoja de trabajo

|  | Puebla No gestantes_6 | Sonora No gestantes_6 | Todo |
| --- | --- | --- | --- |
|  |  |  |  |
| Norfloxacina Resistente | 14 | 19 | 33 |
| Norfloxacina Sensible | 11 | 31 | 42 |
| Todo | 25 | 50 | 75 |

*Contenido de la celda
      Conteo*

Prueba exacta de Fisher

| Valor p |
| --- |
| 0.149742 |

Estadísticas tabuladas: LEVOFLOXACINA, Columnas de la ... de trabajo

Filas: LEVOFLOXACINA   Columnas: Columnas de la hoja de trabajo

|  | Puebla No gestantes_7 | Sonora No gestantes_7 | Todo |
| --- | --- | --- | --- |
|  |  |  |  |
| Levofloxacina Resistente | 11 | 16 | 27 |
| Levofloxacina Sensible | 14 | 34 | 48 |
| Todo | 25 | 50 | 75 |

*Contenido de la celda
      Conteo*

Prueba exacta de Fisher

| Valor p |
| --- |
| 0.321042 |

Estadísticas tabuladas: AMPICILINA, Columnas de la hoja de trabajo

Filas: AMPICILINA   Columnas: Columnas de la hoja de trabajo

|  | Puebla No gestantes_8 | Sonora No gestantes_8 | Todo |
| --- | --- | --- | --- |
|  |  |  |  |
| Ampicilina Resistente | 25 | 50 | 75 |
| Ampicilina Sensible | 0 | 0 | 0 |
| Todo | 25 | 50 | 75 |

*Contenido de la celda
      Conteo*

*** ERROR * No se puede calcular la Prueba exacta de Fisher.**

Estadísticas tabuladas: CEFALOTINA, Columnas de la hoja de trabajo

Filas: CEFALOTINA   Columnas: Columnas de la hoja de trabajo

|  | Puebla No gestantes_9 | Sonora No gestantes_9 | Todo |
| --- | --- | --- | --- |
|  |  |  |  |
| Cefalotina Resistente | 25 | 49 | 74 |
| Cefalotina Sensible | 0 | 1 | 1 |
| Todo | 25 | 50 | 75 |

*Contenido de la celda
      Conteo*

Prueba exacta de Fisher

| Valor p |
| --- |
| 1 |

Estadísticas tabuladas: CEFUROXIMA, Columnas de la hoja de trabajo

Filas: CEFUROXIMA   Columnas: Columnas de la hoja de trabajo

|  | Sonora No gestantes_10 | Puebla No gestantes_10 | Todo |
| --- | --- | --- | --- |
|  |  |  |  |
| Cefuroxima Resistente | 50 | 23 | 73 |
| Cefuroxima Sensible | 0 | 2 | 2 |
| Todo | 50 | 25 | 75 |

*Contenido de la celda
      Conteo*

Prueba exacta de Fisher

| Valor p |
| --- |
| 0.108108 |

Estadísticas tabuladas: CEFTAZIDIMA, Columnas de la hoja de trabajo

Filas: CEFTAZIDIMA   Columnas: Columnas de la hoja de trabajo

|  | Puebla No gestantes_11 | Sonora No gestantes_11 | Todo |
| --- | --- | --- | --- |
|  |  |  |  |
| Ceftazidima Resistente | 19 | 33 | 52 |
| Ceftazidima Sensible | 6 | 17 | 23 |
| Todo | 25 | 50 | 75 |

*Contenido de la celda
      Conteo*

Prueba exacta de Fisher

| Valor p |
| --- |
| 0.435423 |

Estadísticas tabuladas: CEFOTAXIMA, Columnas de la hoja de trabajo

Filas: CEFOTAXIMA   Columnas: Columnas de la hoja de trabajo

|  | Puebla No gestantes_12 | Sonora No gestantes_12 | Todo |
| --- | --- | --- | --- |
|  |  |  |  |
| Cefotaxima Resistente | 20 | 47 | 67 |
| Cefotaxima Sensible | 5 | 3 | 8 |
| Todo | 25 | 50 | 75 |

*Contenido de la celda
      Conteo*

Prueba exacta de Fisher

| Valor p |
| --- |
| 0.107894 |

Estadísticas tabuladas: CEFTRIAXONA, Columnas de la hoja de trabajo

Filas: CEFTRIAXONA   Columnas: Columnas de la hoja de trabajo

|  | Puebla No gestantes_13 | Sonora No gestantes_13 | Todo |
| --- | --- | --- | --- |
|  |  |  |  |
| Ceftriaxona Resistente | 24 | 50 | 74 |
| Ceftriaxona Sensible | 1 | 0 | 1 |
| Todo | 25 | 50 | 75 |

*Contenido de la celda
      Conteo*

Prueba exacta de Fisher

| Valor p |
| --- |
| 0.333333 |

Estadísticas tabuladas: CEFEPIME, Columnas de la hoja de trabajo

Filas: CEFEPIME   Columnas: Columnas de la hoja de trabajo

|  | Puebla No gestantes_14 | Sonora No gestantes_14 | Todo |
| --- | --- | --- | --- |
|  |  |  |  |
| Cefepime Resistente | 6 | 14 | 20 |
| Cefepime Sensible | 19 | 36 | 55 |
| Todo | 25 | 50 | 75 |

*Contenido de la celda
      Conteo*

Prueba exacta de Fisher

| Valor p |
| --- |
| 0.787614 |

Estadísticas tabuladas: AZTREONAM, Columnas de la hoja de trabajo

Filas: AZTREONAM   Columnas: Columnas de la hoja de trabajo

|  | Puebla No gestantes_15 | Sonora No gestantes_15 | Todo |
| --- | --- | --- | --- |
|  |  |  |  |
| Aztreonam Resistente | 11 | 15 | 26 |
| Aztreonam Sensible | 14 | 35 | 49 |
| Todo | 25 | 50 | 75 |

*Contenido de la celda
      Conteo*

Prueba exacta de Fisher

| Valor p |
| --- |
| 0.304327 |

Estadísticas tabuladas: AMOXICILINA-ÁCIDO ... s de la hoja de trabajo

Filas: AMOXICILINA-ÁCIDO CLAVULÁNICO   Columnas: Columnas de la hoja de trabajo

|  | Puebla No gestantes_16 | Sonora No gestantes_16 | Todo |
| --- | --- | --- | --- |
|  |  |  |  |
| Amoxicilina-Ácido Clavulánico R | 21 | 47 | 68 |
| Amoxicilina-Ácido Clavulánico S | 4 | 3 | 7 |
| Todo | 25 | 50 | 75 |

*Contenido de la celda
      Conteo*

Prueba exacta de Fisher

| Valor p |
| --- |
| 0.212736 |

Estadísticas tabuladas: ... METOXAZOL, Columnas de la hoja de trabajo

Filas: TRIMETOPRIM-SULFAMETOXAZOL   Columnas: Columnas de la hoja de trabajo

|  | Puebla No gestantes_17 | Sonora No gestantes_17 | Todo |
| --- | --- | --- | --- |
|  |  |  |  |
| Trimetoprim con sulfametoxazol | 17 | 35 | 52 |
|  | 8 | 15 | 23 |
| Todo | 25 | 50 | 75 |

*Contenido de la celda
      Conteo*

Prueba exacta de Fisher

| Valor p |
| --- |
| 1 |

Estadísticas tabuladas: NITROFURANTOINA, Columnas ... ja de trabajo

Filas: NITROFURANTOINA   Columnas: Columnas de la hoja de trabajo

|  | Puebla No gestantes_18 | Sonora No gestantes_18 | Todo |
| --- | --- | --- | --- |
|  |  |  |  |
| Nitrofurantoina Resistente | 17 | 41 | 58 |
| Nitrofurantoina Sensible | 8 | 9 | 17 |
| Todo | 25 | 50 | 75 |

*Contenido de la celda
      Conteo*

Prueba exacta de Fisher

| Valor p |
| --- |
| 0.242016 |

Estadísticas tabuladas: CLORAMFENICOL, Columnas de ... ja de trabajo

Filas: CLORAMFENICOL   Columnas: Columnas de la hoja de trabajo

|  | Puebla No gestantes_19 | Sonora No gestantes_19 | Todo |
| --- | --- | --- | --- |
|  |  |  |  |
| Cloramfenicol Resistente | 11 | 25 | 36 |
| Cloramfenicol Sensible | 14 | 25 | 39 |
| Todo | 25 | 50 | 75 |

*Contenido de la celda
      Conteo*

Prueba exacta de Fisher

| Valor p |
| --- |
| 0.806675 |

Estadísticas tabuladas: FOSFOMICINA, Columnas de la hoja de trabajo

Filas: FOSFOMICINA   Columnas: Columnas de la hoja de trabajo

|  | Puebla No gestantes_20 | Sonora No gestantes_20 | Todo |
| --- | --- | --- | --- |
|  |  |  |  |
| Fosfomicina Resistente | 1 | 2 | 3 |
| Fosfomicina Sensible | 24 | 48 | 72 |
| Todo | 25 | 50 | 75 |

*Contenido de la celda
      Conteo*

Prueba exacta de Fisher

| Valor p |
| --- |
| 1 |

Estadísticas tabuladas: COLISTINA, Columnas de la hoja de trabajo

Filas: COLISTINA   Columnas: Columnas de la hoja de trabajo

|  | Puebla No gestantes_21 | Sonora No gestantes_21 | Todo |
| --- | --- | --- | --- |
|  |  |  |  |
| Colistina Resistente | 17 | 34 | 51 |
| Colistina Sensible | 8 | 16 | 24 |
| Todo | 25 | 50 | 75 |

*Contenido de la celda
      Conteo*

Prueba exacta de Fisher

| Valor p |
| --- |
| 1 |

Estadísticas tabuladas: TETRACICLINA, Columnas de la hoja de trabajo

Filas: TETRACICLINA   Columnas: Columnas de la hoja de trabajo

|  | Puebla No gestantes_22 | Sonora No gestantes_22 | Todo |
| --- | --- | --- | --- |
|  |  |  |  |
| Tetraciclina Resistente | 18 | 29 | 47 |
| Tetraciclina Sensible | 7 | 21 | 28 |
| Todo | 25 | 50 | 75 |

*Contenido de la celda
      Conteo*

Prueba exacta de Fisher

| Valor p |
| --- |
| 0.313488 |

Estadísticas tabuladas: ERTAPENEM, Columnas de la hoja de trabajo

Filas: ERTAPENEM   Columnas: Columnas de la hoja de trabajo

|  | Puebla No gestantes_23 | Sonora No gestantes_23 | Todo |
| --- | --- | --- | --- |
|  |  |  |  |
| Ertapenem Resistente | 0 | 4 | 4 |
| Ertapenem Sensible | 25 | 46 | 71 |
| Todo | 25 | 50 | 75 |

*Contenido de la celda
      Conteo*

Prueba exacta de Fisher

| Valor p |
| --- |
| 0.294500 |

**REFERENCES**

1. CLSI. *Performance Standards for Antimicrobial Susceptibility Testing; Twenty-Fifth Informational Supplement*.; 2017.

2. Rashid RA, Tarr PI, Moseley SL. Expression of the Escherichia coli IrgA homolog adhesin is regulated by the ferric uptake regulation protein. *Microb Pathog*. 2006. doi:10.1016/j.micpath.2006.07.006

3. Tiba MR, Yano T, Leite DDS. Genotypic characterization of virulence factors in Escherichia coli strains from patients with cystitis. *Rev Inst Med Trop Sao Paulo*. 2008. doi:10.1590/S0036-46652008000500001

4. Sabate M, Moreno E, Perez T, Andreu A, Prats G. Pathogenicity island markers in commensal and uropathogenic Escherichia coli isolates. *Clin Microbiol Infect*. 2006;12(9):880-886. doi:10.1111/j.1469-0691.2006.01461.x

5. Bush K, Jacoby GA. Updated Functional Classification of -Lactamases. *Antimicrob Agents Chemother*. 2010;54(3):969-976. doi:10.1128/AAC.01009-09

6. Picazo JJ, Gobernado M, Cruz FJ, et al. *Procedimientos En Microbiología Clínica*.; 2011. https://www.seimc.org/contenidos/documentoscientificos/procedimientosmicrobiologia/seimc-procedimientomicrobiologia14.pdf.

7. Shin SH, Lim Y, Lee SE, Yang NW, Rhee JH. CAS agar diffusion assay for the measurement of siderophores in biological fluids. *J Microbiol Methods*. 2001;44(1):89-95. doi:10.1016/S0167-7012(00)00229-3

8. Wiles TJ, Kulesus RR, Mulvey MA. Origins and virulence mechanisms of uropathogenic Escherichia coli. *Exp Mol Pathol*. 2008;85(1):11-19. doi:10.1016/j.yexmp.2008.03.007

9. A. Cravioto, R.J. Gross SMS and BR. STRAINS OF ESCHERICHIA COLI FROM EXTRAINTESTINAL SOURCES : LACK OF. 1979;6:41-44.

10. Rodriguez-Angeles MG. Principales caracter??sticas y diagn??stico de los grupos pat??genos de Escherichia coli. *Salud Publica Mex*. 2002;44(5):464-475. doi:10.1590/S0036-36342002000500011

11. Constantiniu S. *Escherichia coli* enterohemoragic – an emerged pathogen of human infections - Part II. Non-O157 *Escherichia coli*. *J Prev Med*. 2002;10(4):57-73.

12. Blanco JE, Blanco M, Alonso MP, et al. Serotypes , Virulence Genes , and Intimin Types of Shiga Toxin ( Verotoxin ) -Producing Escherichia coli Isolates from Human Patients : Prevalence in Lugo , Spain , from 1992 through 1999. *J Clin Microbiol*. 2013;42(1):311-319. doi:10.1128/JCM.42.1.311

13. Bielaszewska M, Schiller R, Lammers L, et al. Heteropathogenic virulence and phylogeny reveal phased pathogenic metamorphosis in Escherichia coli O2: H6. *EMBO Mol Med*. 2014;6(3):347-357. doi:10.1002/emmm.201303133

14. Bourdin G, Navarro A, Sarker SA, et al. Coverage of diarrhoea-associated Escherichia coli isolates from different origins with two types of phage cocktails. *Microb Biotechnol*. 2014;7(2):165-176. doi:10.1111/1751-7915.12113

15. Donaldson SC, Straley BA, Hegde N V., Sawant AA, DebRoy C, Jayarao BM. Molecular epidemiology of ceftiofur-resistant escherichia coli isolates from dairy calves. *Appl Environ Microbiol*. 2006;72(6):3940-3948. doi:10.1128/AEM.02770-05

16. Molina-López J, Aparicio-Ozores G, Ribas-Aparicio RM, et al. Drug resistance, serotypes, and phylogenetic groups among uropathogenic Escherichia coli including O25-ST131 in Mexico City. *J Infect Dev Ctries*. 2011;5(12):840-849. doi:10.3855/jidc.1703

17. Regua-Mangia AH, Irino K, Da Silva Pacheco R, Pimentel Bezerra RM, Santos Périssé AR, Teixeira LM. Molecular characterization of uropathogenic and diarrheagenic Escherichia coli pathotypes. *J Basic Microbiol*. 2010;50(SUPPL. 1):107-115. doi:10.1002/jobm.200900364

18. Lienemann T, Salo E. Shiga Toxin – producing Escherichia coli Serotype O78 : H – in Family, Finland, 2009 Taru. *Emerg Infect …*. 2012;18(4):577-581. http://www.ncbi.nlm.nih.gov/pmc/articles/PMC3309701/.

19. Blanco M, Blanco JE, Mora a, et al. Types of Shiga Toxin ( Verotoxin ) -Producing Escherichia coli Isolates from Healthy Sheep in Spain Serotypes , Virulence Genes , and Intimin Types of Shiga Toxin ( Verotoxin ) -Producing Escherichia coli Isolates from Healthy Sheep in Spain. *Society*. 2003;41(4):1351-1356. doi:10.1128/JCM.41.4.1351

20. Carrillo-Casas EM, Suástegui-Urquijo Z, Arroyo-Escalante S, et al. E. coli outbreak in a neonate intensive care unit in a general hospital in Mexico City. *Folia Microbiol (Praha)*. 2013;58(3):229-234. doi:10.1007/s12223-012-0202-x

21. Pearce JL, Bettelheim KA, Luke RKJ, Goldwater PN. Serotypes of Escherichia coli in Sudden Infant Death Syndrome. *J Appl Microbiol*. 2010;108(2):731-735. doi:10.1111/j.1365-2672.2009.04473.x

22. Sainz E, Rosario T, Reyes M, Vicente P, Patricia M, Eslava C. Resistencia a antimicrobianos de cepas de E. coli de diversos serotipos aisladas de pacientes de un Hospital Psiquiátrico. *Rev Mex Ciencias Farm*. 2008.

23. Zhang W, Bielaszewska M, Kuczius T, Karch H. Identification, characterization, and distribution of a Shiga toxin 1 gene variant (stx1c) in Escherichia coli strains isolated from humans. *J Clin Microbiol*. 2002. doi:10.1128/JCM.40.4.1441-1446.2002

24. Poppe C, Martin L, Gyles C, et al. Acquisition and transfer of resistance to extended-spectrum cephalosporins by Salmonella Newport and E. coli in the intestinal tract of turkey poults. *Guelph Food Saf Semin Ser Symp Guelph,*. 2004;71(3):1184-1192. doi:10.1128/AEM.71.3.1184
